1

2 Ecological drivers of body size evolution and sexual size dimorphism  
3 in short-horned grasshoppers (Orthoptera: Acrididae)

4

5 Vicente García-Navas<sup>1\*</sup>, Víctor Noguerales<sup>2</sup>, Pedro J. Cordero<sup>2</sup> and Joaquín Ortego<sup>1</sup>

6

7

8 \*Corresponding author: [vicente.garcianavas@ebd.csic.es](mailto:vicente.garcianavas@ebd.csic.es); [vicente.garcianavas@gmail.com](mailto:vicente.garcianavas@gmail.com)

9 *Department of Integrative Ecology, Estación Biológica de Doñana (EBD-CSIC), Avda. Américo*

10 *Vespucio s/n, Seville E-41092, Spain*

11

12

13 Running head: SSD and body size evolution in Orthoptera

14

15 Sexual size dimorphism (SSD) is widespread and variable in nature. Although female-biased  
16 SSD predominates among insects, the proximate ecological and evolutionary factors promoting  
17 this phenomenon remain largely unstudied. Here, we employ modern phylogenetic comparative  
18 methods on 8 subfamilies of Iberian grasshoppers (85 species) to examine the validity of  
19 different models of evolution of body size and SSD and explore how they are shaped by a suite  
20 of ecological variables (habitat specialization, substrate use, altitude) and/or constrained by  
21 different evolutionary pressures (female fecundity, strength of sexual selection, length of the  
22 breeding season). Body size disparity primarily accumulated late in the history of the group and  
23 did not follow a Brownian motion pattern, indicating the existence of directional evolution for  
24 this trait. We found support for the converse of Rensch's rule across all taxa but not within the  
25 two most speciose subfamilies (Gomphocerinae and Oedipodinae), which showed an isometric  
26 pattern. Our results do not provide support for the fecundity or sexual selection hypotheses and  
27 we did not find evidence for significant effects of habitat use. Contrary to that expected, we  
28 found that species with narrower reproductive window are less dimorphic in size than those that  
29 exhibit a longer breeding cycle, suggesting that male protandry cannot solely account for the  
30 evolution of female-biased SSD in Orthoptera. Our study highlights the need to consider  
31 alternatives to the classical evolutionary hypotheses when trying to explain why in certain insect  
32 groups males remain small.

33 *Key words:* Caelifera; phylogeny; SSD; Rensch's rule; size evolution; tempo and mode

34

35

36 Body size is a key trait in any organism, as it influences fitness through its effects on  
37 reproduction and survival (Fairbairn et al. 2007). Body size can respond to different  
38 evolutionary forces in a sex-specific manner and, as a result, this trait often differs between  
39 males and females in many taxa (Darwin 1871). Although male-biased sexual size dimorphism  
40 (SSD) is the common rule among endotherms (mammals and birds), female-biased SSD  
41 predominates among insects (e.g. Elgar 1991, Cheng and Kuntner 2014, Hochkirch and Gröning  
42 2008, Bidau et al. 2016). In those species in which females are larger than males, it is assumed  
43 that natural selection on female body size (*via* increased fecundity) overrides sexual selection  
44 (through competition advantages during mate acquisition) on male body size. However, many  
45 other ecological pressures (e.g. habitat, substrate use, length of life cycle) can determine body  
46 size evolution in one or both sexes and contribute to shape observed patterns of SSD (Fairbairn  
47 et al. 2007, Blanckenhorn et al. 2007a, Fairbairn 2013).

48         Body size variation among related species often follows evolutionary patterns that are  
49 remarkably consistent across taxa. According to the Rensch's rule, SSD increases with body  
50 size when males are the larger sex and decreases with size when females are larger (Rensch  
51 1950, Abouheif and Fairbairn 1997, Fairbairn 1997). In contrast, if selection pressures on  
52 females are the main driver of SSD evolution, then SSD should increase with average body size  
53 in female-biased SSD species (the converse of Rensch's rule). Alternatively, SSD can remain  
54 isometric when body size changes in males and females at the same rate, a plausible scenario  
55 when multiple evolutionary forces (e.g. sexual selection and fecundity selection) act  
56 synergically with no overall general trend. Another broad-scale pattern of body size variation is  
57 the Bergmann's rule, which posits the existence of a positive relationship between body size and  
58 latitude and altitude, with smaller individuals being found at lower latitudes/altitudes where  
59 temperatures are generally higher (Mayr 1956). However, ectotherms often follow the converse  
60 of Bergmann's rule with larger individuals and species at lower latitudes and altitudes (reviewed  
61 in Shelomi 2012). The most likely explanation for this inverted cline is the interaction between  
62 the length of the growing season (which decreases as latitude and altitude increase) and the time  
63 available to complete development. Slowly developing insects may compensate for a short

64 season by decreasing development time, that is, by reaching the adult stage at a smaller size  
65 (e.g. reducing the number of larval instars; Blanckenhorn and Demont 2004). However, some  
66 species do not exhibit protandry and both sexes reach adulthood at about the same time but at  
67 different sizes (Blanckenhorn et al. 2007b).

68 In Orthoptera, females are usually larger than males. Hochkirch and Gröning (2008)  
69 reported that virtually all of the 1106 Caelifera species analyzed showed female-biased SSD  
70 (see also Bidau et al. 2016 for a review). From the female perspective, it seems to be clear that a  
71 large body size may confer an advantage in terms of increased fecundity (e.g. Cueva del Castillo  
72 and Núñez-Farfán 1999; Whitman 2008). Conversely, small males may benefit from early  
73 maturity, greater agility, or lower predation rates (see Whitman 2008 and references therein; see  
74 also Blanckenhorn 2000). When the evolution of male and female body size follows divergent  
75 evolutionary trajectories, it leads to a decoupling of male and female size evolution.

76 However, absolute decoupling is rather unlikely because genetic correlations between males and  
77 females will tend to constrain independent size evolution of both sexes. Body size decoupling  
78 has been suggested as the main cause for the existence of extremely female-biased SSD in  
79 spiders, a taxonomic group that has dominated studies on arthropods in this respect (Hormiga et  
80 al. 2000, Kuntner and Coddington 2009, Kuntner and Elgar 2014). On the contrary, there is a  
81 paucity of interspecific studies on SSD in Orthopterans even though they are fairly abundant,  
82 easy to collect, and have large geographic distributions, which makes them an ideal model  
83 system to address these questions.

84 In this study, we employ phylogenetic comparative methods to examine the evolution of  
85 body size in short-horned grasshoppers (Orthoptera: Caelifera: Acrididae) and test how this trait  
86 co-varies with SSD through evolutionary time. To this end, we constructed a phylogeny  
87 comprising a representative sample ( $n = 85$  taxa) of all extant species present in the Iberian  
88 Peninsula (Presa et al. 2007), including slant-faced grasshoppers (subfamily Gomphocerinae, 48  
89 spp.), band-winged grasshoppers (Oedipodinae, 19 spp.), spur-throated grasshoppers  
90 (Catantopinae, 6 spp.) and other minority groups (e.g. silent slant-faced grasshoppers,  
91 Acridinae). Specifically, we first assessed the tempo and mode of evolution of body size and

92 SSD, which allowed us to infer whether neutral or selective forces drove the evolution of these  
93 traits. Second, we examined patterns of body size evolution, including altitudinal clines of body  
94 size (Bergmann's rule) and allometric scalings of male and female body size (Rensch's rule).  
95 Finally, we analyzed the proximate ecological factors (habitat specialization, substrate type,  
96 altitude) and evolutionary constraints (female fecundity, strength of sexual selection, length of  
97 the breeding season) that may underlie the evolution of male and female body size in these  
98 large-bodied insects. Our study constitutes the first to provide a comprehensive view about the  
99 factors promoting body size evolution and size dimorphism at the interspecific level in  
100 Orthopterans.

101

102

## 103 **Material and Methods**

### 104 **Sampling**

105 Grasshoppers were collected during several field campaigns carried out throughout the Iberian  
106 Peninsula (see e.g. Ortego et al. 2010, 2012, 2015). Specimens were identified using current  
107 identification keys for Palearctic gomphocerine species (Harz 1975, Pascual 1978, Pardo et al.  
108 1991, Lluiciá-Pomares 2002), and preserved in 96% ethanol. Our sample ( $n = 85$ ) accounted for  
109 three quarters of all extant Acrididae species present in the Iberian Peninsula (83% and 66% of  
110 all Gomphocerinae and Oedipodinae species, respectively; Presa et al. 2007). Thus, our sample  
111 is representative of the natural variation in this region (580 000 km<sup>2</sup>), including eight of the nine  
112 families into which Iberian short-horned grasshoppers have been grouped (Presa et al. 2007).  
113 More than half of the species (56%) included in this study are endemic to the Iberian Peninsula  
114 or have a distribution restricted to Iberia, France and North Africa.

115

### 116 **Molecular data**

117 Genomic DNA was extracted from the hind femur of the specimens using a salt-extraction  
118 protocol (Aljanabi and Martínez 1997). Four mitochondrial gene fragments -(1) cytochrome c  
119 oxidase subunit 1 (COI), (2) NADH dehydrogenase subunit 5 (ND5), (3) 12S rRNA (12S) and

120 (4) a fragment containing parts of 16S rRNA (16S)- were amplified by polymerase chain  
121 reaction and sequenced. Two nuclear genes were also tested (elongation factor 1  $\alpha$  EF-1 and  
122 28S ribosome unit), but these were discarded because their analysis yielded uninformative  
123 topologies with poor resolution (see also Song et al. 2015). For some taxa we failed to obtain  
124 reliable sequences, so we complemented our data set with additional sequences retrieved from  
125 GenBank. We mainly relied on sequences from two previously published phylogenies:  
126 Contreras and Chapco (2006) and Nattier et al. (2011).

127

#### 128 Phylogenetic analyses

129 Sequences were aligned in MAFFT online version 7 (<http://mafft.cbrc.jp/alignment/server/>;  
130 Katoh and Standley 2013) using a L-INS-i strategy. The alignments of the ribosomal genes  
131 (12S, 16S) contained highly unequal distribution of indels and thus, were edited by hand in  
132 order to eliminate divergent regions of the alignment and poorly aligned positions. Protein-  
133 coding genes (COI, ND5) were checked for stop codons and their correct translation to amino  
134 acids in Geneious 8.1.7. The sequences of the four genes (12S, 16S, COI and ND5) were  
135 trimmed to 380, 469, 568 and 635 base pairs (bp), respectively, to reduce the proportion of  
136 missing data. We used Sequencematrix 1.7.8. (Vaidya et al. 2011) to concatenate single  
137 alignment fragments, resulting in a concatenated matrix for a total length of 2055 bp. We were  
138 not able to obtain reliable sequences from all four markers for some taxa. However, we opted  
139 for adding taxa with missing data since this generally increases phylogenetic accuracy (see  
140 Hughes and Vogler 2004). The number of sequences per locus obtained was as follows: 79 for  
141 COI, 67 for ND5, 80 for 12S, and 78 for 16S. *Pyrgomorpha conica* (Acridoidea) was included  
142 as outgroup in all phylogenetic analyses (Chapco and Contreras 2011).

143 We performed phylogenetic inference and assessed the support of the clades following  
144 two methods: maximum likelihood (ML) and Bayesian inference (BI). We calculated the best-  
145 fit models of nucleotide substitution for each of the four genes according to the weighted  
146 Akaike Information Criterion (AIC) using jModelTest 0.1.1 (Posada 2008). The TIM2+I+ $\Gamma$   
147 substitution model was selected for 12S, GTR+I+  $\Gamma$  for 16S, TrN+I+  $\Gamma$  model for ND5 and

148 TPM3uf+I+  $\Gamma$  was selected for COI. Maximum likelihood analyses were conducted using  
149 GARLI version 2.0 (Zwickl 2006) and PHYML (Guindon and Gascuel 2006). A ML  
150 bootstrapping procedure was run in GARLI with two search replicates and 1000 bootstrap  
151 replicates. The best-fit substitution model for each partition (gene) was assigned by setting the  
152 rate matrix, nucleotide state frequencies and proportion of invariable sites. We selected the best  
153 (optimal) tree and obtained support for the clades from a majority-rule (50%) consensus tree  
154 computed in PAUP\* version 4 (Swofford 2002).

155 Bayesian analyses were conducted using MrBayes 3.2 (Ronquist et al. 2012) applying a  
156 nucleotide substitution model specific to each partition (gene): HKY+I+  $\Gamma$  for 12S and COI, and  
157 GTR +I+  $\Gamma$  for 16S and ND5. We performed two independent runs with four simultaneous  
158 Markov chain Monte Carlo (MCMC) chains, running for a total of 10 million generations and  
159 sampled every 1000th generation. The first 25% of samples were discarded as burn-in and a  
160 consensus tree from the remaining 7501 trees was built using the “sumt” command before  
161 visualization in FigTree v.1.3.1 (Rambaut et al. 2009) (see Supporting Information). A second  
162 Bayesian analysis was run with BEAST 1.8.0 (Drummond et al. 2012) in order to estimate the  
163 relative time of divergence of the studied taxa. Runs were carried out under an uncorrelated  
164 lognormal relaxed-clock model and applying a Yule process as tree prior. Two calibration  
165 points were used to impose age constraints on some nodes of the tree allowing us to translate the  
166 relative divergence times into absolute ones. We employed as a first calibration point the split  
167 between Gomphocerinae and Oedipodinae, estimated to have occurred ~100 Mya ago. This  
168 estimate is based on dated ancient cockroach fossils (Gaunt and Miles 2002, Fries et al. 2007).  
169 As a second calibration point, we used the divergence between *Sphingonotus azurescens*  
170 (mainland species) and *S. guanchus* (endemic to La Gomera Island, Canary Islands), whose  
171 estimated age is around 3.5 Mya (Husemann et al. 2014). *Sphingonotus guanchus* was only  
172 included in the BEAST analysis for calibration purposes. Substitution parameters were based on  
173 analyses previously conducted in jModeltest. We performed two independent runs of  $100 \times 10^5$   
174 generations, sampled every 100,000 generations. We then used Tracer 1.4.1. to examine  
175 convergence, determine the effective sample sizes (EES) for each parameter, and compute the

176 mean and 95% highest posterior density (HPD) interval for divergence times. We confirmed  
177 EES >200 was achieved for all parameters after the analyses. Tree and log files (12 000 trees  
178 after a 5% burn-in) of the two runs were combined with LogCombiner 1.4.7 (Drummond et al.  
179 2012), and the maximum clade credibility (MCC) tree was compiled with TreeAnnotator 1.4.7.  
180 The concatenated matrix and the ML and Bayesian phylogenies (in Nexus format) are available  
181 in Dryad and TreeBASE Web, respectively. The obtained phylogenies were robust and largely  
182 consistent with previous studies (Nattier et al. 2011).

183

#### 184 Morphological data

185 Adult size was characterized from the length of the left hind femur. We used femur length as an  
186 indicator of body size since the total length of females varies substantially with the oviposition  
187 cycle (Hochkirch and Gröning 2008). Femur length was strongly correlated with structural body  
188 length excluding the abdomen (i.e. head + thorax) in both sexes (males:  $R^2 = 0.70$ ,  $p < 0.001$ ;  
189 females:  $R^2 = 0.65$ ,  $p < 0.001$ ). Femur length scales isometrically with body length ( $\beta_{\text{males}} =$   
190  $0.964$ ,  $\beta_{\text{females}} = 1.048$ ) and thus, constitutes a good proxy for adult body size (see also Ortego et  
191 al. 2012, Laiolo et al. 2013, Anichini et al. 2016, Bidau et al. 2016). Hind legs were carefully  
192 removed from the body of adults in the laboratory under a ZEISS stereomicroscope (SteREO  
193 Discovery V.8; Carl Zeiss Microscopy GmbH, Germany) and photographed using ZEISS image  
194 analysis software (ZEN2). Measurements of femur length were made on a total of 720  
195 individuals, 365 males and 355 females (4-5 individuals of each sex per species). Because SSD  
196 is practically always female sex-biased in most orthopteroids, we quantified sexual size  
197 dimorphism as the ratio of female to male femur length (the simplest SSD estimator; see Lovich  
198 and Gibbons 1992). In addition, we quantified the relative length of the stridulatory file (i.e.  
199 length of the stridulatory file/femur length\*100) for Gomphocerinae species. The stridulatory  
200 file consists of a row of pegs located on the inner side of the femur of each hind leg (e.g. Jago  
201 1971). Gomphocerine grasshoppers produce acoustic signals (songs) by rubbing this structure  
202 against the forewings. Calling songs are used to search for conspecific mates and, thus, the  
203 evolution of the stridulatory apparatus is expected to be subject to sexual selection (von



204 Helversen and von Helversen 1994, Mayer et al. 2010, Nattier et al. 2011). Males with larger  
205 sound-generating organs are able to produce low frequency sound, which is associated with  
206 larger male body size (see Anichini et al. 2016 and references therein). For example, in a  
207 comparative study of 58 bushcricket species, Montealegre-Z (2009) showed that the length of  
208 the stridulatory file correlated positively with male body size and pulse duration. Hence, we  
209 used the relative length of the stridulatory file as a proxy of the strength of pre-copulatory  
210 sexual selection in this subfamily.

211

212 Life-history and ecological data

213 i) Fecundity

214 Given that large females can generally allocate more resources and energy to reproduction  
215 resulting in more offspring and/or higher-quality offspring, fecundity selection usually favors  
216 larger body size in females (reviewed in Pincheira-Donoso and Hunt 2016). We tested for  
217 fecundity selection by using mean ovariole number (which reflects the number of eggs produced  
218 in a discrete time interval) as an index of a species' potential fecundity. Ovariole number is a  
219 strong determinant of fecundity, and therefore fitness because it sets the upper limit for  
220 reproductive potential (i.e. females with more ovarioles can produce more eggs in a discrete  
221 time interval) (Stauffer and Whitman 1997, Taylor and Whitman 2010). This parameter was  
222 extracted from different sources (Ingrisch and Köhler 1998, Reinhardt et al. 2005, Schultner et  
223 al. 2012) for a subset of species ( $n = 20$ ; see Supporting Information).

224

225 ii) Substrate use

226 The substrate or structure on which a species rests can have major implications for the evolution  
227 of body size and SSD. For example, Moya-Laraño et al. (2002) proposed the so-called “gravity  
228 hypothesis” to explain patterns of SSD in spiders whereby species building webs high in the  
229 vegetation are predicted to show greater SSD than those that build lower down. Whilst, Brandt  
230 and Andrade (2007) proposed that the prevalence of female-biased SSD in species that occupy  
231 elevated substrates may be explained by selective advantages for small males in vertical habitats

232 and for large males of low-dwelling species to run faster on the ground. In this sense, a previous  
233 study has shown that life form correlated with individual size in grasshoppers from Inner  
234 Mongolia (Yan and Chen 1997); larger species were typically terricoles, whereas the smaller  
235 ones were typically planticoles. Here, we tested if ground-dwelling grasshoppers exhibit a lower  
236 level of SSD than those species that perch on plants after correcting for phylogeny. To that end,  
237 each species was assigned to one of the two categories (ground *vs.* plant-perching) based on the  
238 literature (e.g. Default and Morichon 2015), personal observations and a survey of photographs  
239 available in open-access online repositories (<http://www.biodiversidadvirtual.org>;  
240 <http://www.pyrgus.de>; <http://www.orthoptera.ch>).

241

242 iii) Length of the breeding season

243 Season length has been postulated as another important factor in driving body size evolution.  
244 Individuals can become larger by lengthening the growth period but at the expense of a high  
245 cost: they may die before reproducing. In contrast, for example in ephemeral habitats, an  
246 individual can rush through its development in order to reach adulthood faster and reproduce  
247 (Roff 1980, Blanckenhorn and Demont 2004). In this sense, the length of the breeding season in  
248 conjunction with ambient temperature has been postulated as the main cause for the existence of  
249 altitudinal phenotypic clines in many ectothermic species with short generation times (Masaki  
250 1967, Chown and Klok 2003). In Orthopterans, several studies have reported a reduction in  
251 body size with altitude (e.g. Berner and Blanckenhorn 2006, Bidau and Martí 2007a, but see  
252 also Sanabria-Urbán et al. 2015). Accordingly, we would expect small adult size in species with  
253 a short life-span and/or species inhabiting higher altitudes (supposedly more seasonal habitats)  
254 because a shorter growing season should select for earlier maturation and smaller body size. To  
255 test such a hypothesis, we compiled information on the length (in months) of the life-cycle of  
256 each species from the available literature (e.g. Lluçia-Pomares 2002) and our own field  
257 observations. The length of the breeding season oscillated between 2 and 12 months, that is,  
258 from species only present as adults during the summer period to those present all year round.  
259 Species that have adults present year round likely have more than one generation each year (i.e.

260 bivoltine species) and thus a period of sexual diapause. Because it might compromise the  
261 reliability of our results, we repeated our analyses after excluding such species (five excluded  
262 species). In addition, a subset of species was classified into three categories (low-altitude,  
263 medium-altitude, high-altitude) according to the altitudinal range in which these species can be  
264 found (e.g. Pardo and Gómez 1995; Lluçia-Pomares 2002; authors, *pers. obs.*). Those species ( $n$   
265 = 16) with a broad altitudinal range (e.g. from 0 to 2000 m; see Supporting Information) were  
266 discarded from this analysis.

267

#### 268 iv) Habitat specialization

269 The level of ecological specialization of an organism, that is, its variance in performance across  
270 a range of environmental conditions or resources, has implications in terms of population  
271 density and local competition (e.g. Devictor et al. 2010, Parent et al. 2014), two factors often  
272 associated with the extent of sexual dimorphism. Selection for larger male size is expected to be  
273 greater in species with a narrow ecological niche (i.e. specialist species) and/or limited dispersal  
274 ability due to strong intrasexual competition for resources. Accordingly, we predict higher  
275 levels of SSD in generalist species. In order to obtain a measure of ecological specialization, we  
276 calculated the so-called ‘Paired Difference Index’ (PDI) (Poisot et al. 2011, 2012) from a  
277 species-habitat matrix in which we rated the level of association of each species (from complete  
278 generalist, 0, to complete specialist, 3) with the nine most common habitats in which these  
279 species can be found (see Supporting Information). The PDI is a robust specialization index  
280 which takes into account not only the number of resources used by a species, but also the  
281 strength of the association between the species and its resources (Poisot et al. 2012). Scores of  
282 species-habitat association were obtained directly from the literature (research articles,  
283 monographs and field guides) and our own personal observations (Table S1, Supporting  
284 Information). PDI values were computed using the *bipartite* package in R (Dormann et al.  
285 2016).

286

#### 287 Phylogenetic comparative analyses

288 For each studied variable (male size, female size, SSD, length of the breeding season, length of  
289 the stridulatory file, ovariole number, PDI) we assessed the amount of phylogenetic signal, a  
290 measure of how similar closely related species are to one another for a given trait. To assess  
291 phylogenetic signal we used Pagel's lambda ( $\lambda$ ; Pagel 1999) and Blomberg's  $K$  (Blomberg et al.  
292 2003) computed using the "phylosig" function in the R package *phytools* (Revell 2011). To  
293 visualize substrate (binary variable; ground: 0; plant-perching: 1) variation among species on  
294 the phylogenetic tree we used maximum likelihood reconstruction in MESQUITE v. 3.04  
295 (Maddison and Maddison 2015). We also reconstructed ancestral states for our focal trait, SSD,  
296 in MESQUITE.

297 We tested for departure from a null model of constant rate of diversification using the  $\gamma$   
298 statistic as implemented in *ape* (Paradis et al. 2014). A significantly negative value of  $\gamma$   
299 indicates a decelerating rate of cladogenesis through time. The  $\gamma$  statistic is biased by  
300 incomplete taxon sampling, because the number of divergence events tends to be increasingly  
301 underestimated toward the present (favoring negative values for the  $\gamma$ ). Therefore, we corrected  
302 for undersampling using the Markov chain constant-rates (MCCR) test (Pybus & Harvey 2000)  
303 as implemented in the *laser* package (Rabosky 2006). Recent MEDUSA analyses performed by  
304 Song et al. (2015) indicate that the lineage leading up to Acrididae has undergone a significant  
305 increase in diversification rate with little or no extinction. Thus, values of  $\gamma$  are unlikely to be  
306 biased by extinction rates.

307 We investigated the mode of male and female body size evolution by comparing fits of  
308 these traits to four different models of evolution using the Akaike information criterion (Akaike  
309 weights, AICw, and size-corrected Akaike values, AICc): i) pure Brownian Motion (null) model  
310 (BM), ii) Ornstein-Uhlenbeck (OU), iii) 'early-burst' (EB) and iv) time-variant rate (TVR)  
311 model. Under BM, traits evolve along a random walk whereby each change is independent of  
312 the previous change (morphological drift; Felsenstein 1985). The OU model describes a random  
313 walk with a single stationary peak, such that trait values have a tendency to return to an optimal  
314 value ( $\theta$ ) (Hansen 1997, Butler and King 2004). Under an EB model, the net rate of evolution  
315 slows exponentially through time as the radiation proceeds (Blomberg et al. 2003), whereas the

316 TVR model is similar to an EB model but also allows an exponential increase of evolutionary  
317 rates through time (Pagel 1999). The TVR model can be used to evaluate the non-constant rate  
318 of evolution through time using the path-length scaling parameter Pagel's delta,  $\delta$ . This  
319 parameter detects differential rates of evolution over time (i.e.  $\delta = 1$  means gradual evolution).  
320 If  $\delta < 1$ , shorter paths contribute disproportionately to trait evolution (decelerating evolution)  
321 whereas if  $\delta > 1$  is the signature of accelerating evolution as time progresses (see Hernández et  
322 al. 2013). Specifically, we expected female size to show a trend towards larger sizes (i.e.  
323 directional selection for increased female size) whereas males would likely be maintained at  
324 optimal values (i.e. directional selection for the maintenance of small male size according to an  
325 OU model). From these models we calculated the evolutionary rate ( $\sigma^2$ ) for each sex in order to  
326 determine whether body size evolution of males was faster or slower than body size evolution of  
327 females. Evolutionary models were run using the R package *geiger* (Harmon et al. 2008).  
328 Additionally, we applied two complementary methods: the morphological diversity index (MDI,  
329 Harmon et al. 2003) and the node-height test (Freckleton & Harvey 2006) to analyze patterns of  
330 evolution. Both methods test for departure from Brownian motion but differ in the approach  
331 used to test for this departure. First, we calculated disparity through time (DTT) plots using the  
332 'dtt' function in the *geiger* package. DTT analyses compare phenotypic diversity simulated  
333 under a Brownian Motion model with observed phenotypic diversity among and within  
334 subclades relative to total disparity at all time steps in a time-calibrated phylogeny. Low (i.e.  
335 negative) values of relative disparity indicate that most morphological disparity originated early  
336 in the history of the group (early divergence), whereas high (positive) values indicate that most  
337 morphological disparity originated more recently compared to a random walk pattern (recent  
338 phenotypic divergence). Values near 0 indicate that evolution has followed BM. The MDI was  
339 calculated as the sum of the areas between the curve describing the morphological disparity of  
340 the trait and the curve describing the disparity under the null hypothesis of BM (1 000  
341 simulations). Finally, we used the node-height test (Freckleton & Harvey 2006) to test whether  
342 grasshopper body size evolution has slowed over time. We computed the absolute value of  
343 standardized independent contrasts for body size on our MCC tree and correlated them with the

344 height of the node at which they are generated. A significant negative relationship between  
345 absolute contrast value and node age implies that rates of body size evolution slow down over  
346 time according to a niche-filling model ('early-burst' of trait evolution).

347

348 Ecological correlates of body size and SSD

349 To explore the association between SSD and our continuous ecological (habitat specialization,  
350 breeding season length) and reproductive (fecundity, length of the stridulatory file) variables,  
351 we used phylogenetic generalized least squares (PGLS<sub>*λ*</sub>). Maximum likelihood estimates of the  
352 branch length parameters delta (a measure of disparity of rates of evolution through time, see  
353 above), lambda (a measure of phylogenetic signal, see above) and kappa (which contrasts  
354 punctuational vs. gradual trait evolution, see Hernández et al. 2013) were obtained to optimize  
355 the error structure of the residuals in each comparison as recommended by Revell (2010). PGLS  
356 regression analyses were performed using the R package *caper* (Orme 2013) and graphically  
357 visualized by means of phylogenetically independent contrasts (PIC) computed using the  
358 PDAP:PDTREE module in MESQUITE (Midford et al. 2005). To test the influence of categorical  
359 variables (substrate, altitude class) on our focal traits independently from the phylogeny, we  
360 employed phylANOVA (10 000 simulations) as implemented in the R package *phytools* (Revell  
361 2011).

362 We tested for greater evolutionary divergence in male size compared with female size  
363 (Rensch's rule test) by regressing log-transformed male body size against log female body size  
364 using phylogenetic major axis regressions (PRMA; Revell 2011), a method that accounts for the  
365 shared evolutionary history of species. This analysis was performed at two taxonomic levels,  
366 across our entire phylogeny and within the two largest subfamilies (Gomphocerinae,  
367 Oedipodinae) because Rensch's rule was originally proposed for 'closely-related species'  
368 (Rensch 1950). We tested if the slope ( $\beta$ ) of the regression of body size of males on females was  
369 larger than 1 (as predicted by Rensch's rule), smaller than 1 (converse of Rensch' rule) or not  
370 different from 1 (i.e.  $\beta = 1$ ; isometric pattern) (see Ceballos et al. 2013 for more details about  
371 the possible scenarios for the relationship between SSD and body size of males and females).

372 Statistical significance of the allometric pattern was determined based on the 95% confidence  
373 intervals (CI) of  $\beta$  using the *smatr* R package (Warton et al. 2012).

374

375

## 376 **Results**

### 377 Phylogenetic signal

378 Both male and female body size exhibited a strong phylogenetic signal (male body size:  $\lambda =$   
379  $0.955, p < 0.01; K = 0.267, p = 0.016$ ; female body size:  $\lambda = 0.956, p < 0.001; K = 0.213, p =$   
380  $0.03$ ), which indicates that the body size of related species is more similar than expected under  
381 Brownian Motion. Accordingly, we also found a strong phylogenetic signal for SSD ( $\lambda = 0.904,$   
382  $p = 0.03; K = 0.225, p < 0.01$ ; Fig. 1). The relative length of the stridulatory file showed a  
383 moderate phylogenetic signal ( $\lambda = 0.589, p = 0.09; K = 0.114, p = 0.02$ ), whereas the level of  
384 ecological specialization (PDI) ( $\lambda \sim 0, p = 1; K = 0.06, p = 0.36$ ) and the length of the breeding  
385 season ( $\lambda = 0.627, p = 0.01; K = 0.107, p = 0.08$ ; Fig. 1) did not show phylogenetic inertia.  
386 Ovariolo number showed a strong phylogenetic signal ( $\lambda \sim 1, p < 0.001; K = 1.987, p < 0.001$ ).  
387 Substrate type (ground vs. plant-perching) seems to be a conservative trait in short-horned  
388 grasshoppers; ground-species are predominant in the Oedipodinae subfamily whereas plant-  
389 perching species are more abundant within the Gomphocerinae subfamily (see Fig. 1).

390

### 391 Tempo and mode of body size evolution

392 The rate of diversification accelerated with time ( $\gamma = 1.68$ ) indicating that rapid diversification  
393 occurred late in the evolutionary history of the group. When comparing alternative models of  
394 evolution across the entire dataset, the OU model (Brownian Motion with selective constraint)  
395 exhibited the best fit for the evolution of male body size whereas the OU and the TVR models  
396 were equally supported for female body size ( $\Delta AICc < 2$ ) (Table 1). When restricting our  
397 analyses to the Gomphocerinae subfamily, we found that the best-supported model for the  
398 evolution of both male and female body size was TVR (Table 1), suggesting that trait evolution  
399 is non-constant through time. In Oedipodinae, the BM model provided a better fit than the other

400 models for the evolution of male body size whereas BM and the two non-constant models (EB  
401 and TVR) were similarly supported ( $\Delta\text{AICc} < 2$ ) in females (Table 1). The comparison of  
402 evolutionary rates between sexes indicated that body size evolved at a similar pace (Table 1).

403 Maximum likelihood estimates of  $\delta$  computed for all taxa and for each of the two  
404 subfamilies were high ( $\delta$  values: all clades; male body size: 2.45, female body size: 3.00;  
405 *Gomphocerinae*; male body size: 2.53, female body size: 3.00; *Oedipodinae*; male body size:  
406 3.00, female body size: 3.00) suggesting that longer paths (i.e. later evolution of the trait in the  
407 phylogeny) contribute disproportionately to trait evolution ('late-burst').

408 DTT plots showed that phenotypic disparity within lineages is greater than expected  
409 under a BM model late in the diversification of Acrididae (Fig. 2). We obtained positive MDI  
410 statistics, indicating that the proportion of total morphological disparity within clades was less  
411 than expected by a Brownian Motion model for all taxa and each of the two subfamilies  
412 (average MDI values: all clades; male body size: 0.138, female body size: 0.101;  
413 *Gomphocerinae*; male body size: 0.342, female body size: 0.212; *Oedipodinae*; male body size:  
414 0.088, female body size: 0.357).

415 Concordant with late shifts in the acceleration of the net diversification rate, the node-  
416 height test resulted in a positive but non-significant relationship between the absolute values of  
417 standardized length contrasts and node age in both sexes (*males*:  $t = 1.01$ , d.f. = 83,  $p = 0.32$ ;  
418 *females*:  $t = 0.72$ , d.f. = 83,  $p = 0.47$ ) across all taxa. For the *Gomphocerinae* subset, we found a  
419 positive and significant relationship between the absolute value of independent contrasts and the  
420 height of the node from which they were generated (*males*:  $t = 2.46$ , d.f. = 45,  $p = 0.02$ ; *females*:  
421  $t = 3.11$ , d.f. = 45,  $p = 0.003$ ), indicating that body size evolution has increased through time.

422 When restricting our analyses to the *Oedipodinae* subfamily, the node height test yielded a  
423 negative and non-significant relationship for the evolution of male and female body size (*male*  
424 *body size*:  $t = -0.60$ , d.f. = 18,  $p = 0.55$ ; *female body size*:  $t = -1.02$ , d.f. = 18,  $p = 0.32$ ).

425

426 Ecological correlates of body size and SSD



427 We found a negative significant association between SSD and female body size (PGLS;  
428 estimate:  $-0.444 \pm 0.102$ ,  $t = -4.34$ ,  $p < 0.001$ ) but not such association between SSD and male  
429 body size (PGLS;  $t = 1.05$ ,  $p = 0.30$ ) across taxa. A similar result was found for the  
430 Gomphocerinae subset (PGLS, *female size*: estimate:  $-0.458 \pm 0.101$ ,  $t = 4.492$ ,  $p < 0.001$ ; *male*  
431 *size*:  $t = 0.52$ ,  $p = 0.60$ ). In contrast, in Oedipodinae, we obtained the opposite pattern: a  
432 significant association between SSD and male body size (PGLS; estimate:  $0.666 \pm 0.138$ ,  $t =$   
433  $4.82$ ,  $p < 0.001$ ) but not between SSD and female body size (PGLS;  $t = 0.054$ ,  $p = 0.95$ ). Overall,  
434 the emerging picture was that both sexes tend to be progressively more similar as size increases.  
435 When size decreases within one lineage through evolutionary time, then male size decrease  
436 disproportionately with respect to female body size.

437       When testing for fecundity selection, we failed to find a significant relationship between  
438 ovariole number (a good proxy for the reproductive potential of a given species) and female  
439 body size (PGLS;  $n = 20$ ,  $t = 0.067$ ,  $p = 0.947$ ). When only considering gomphocerine  
440 grasshoppers, no significant association was found between the size-corrected length of the  
441 stridulatory file and SSD (PGLS;  $n = 48$ ,  $t = 0.12$ ,  $p = 0.90$ ) (Fig. 3). Short-lived species did not  
442 show either a greater degree of development of the stridulatory organ as expected if the strength  
443 of sexual selection is higher in species with a shorter breeding period (PGLS;  $n = 48$ ,  $t = -0.59$ ,  
444  $p = 0.55$ ). The degree of SSD was phylogenetically correlated with the length of the breeding  
445 season; species with a long phenology are more dimorphic in size than those with a short  
446 reproductive window (PGLS; estimate:  $-0.010 \pm 0.004$ ,  $n = 85$ ,  $t = -2.16$ ,  $p = 0.035$ ; Fig. 1).  
447 Such a relationship became more significant when excluding year-round species (length of the  
448 breeding season = 11-12 months) from the dataset (PGLS; estimate:  $-0.011 \pm 0.004$ ,  $n = 80$ ,  $t = -$   
449  $2.34$ ,  $p = 0.021$ ; Fig. 4). Although we found that habitat specialist species (high PDI values)  
450 have a shorter breeding cycle than more generalist species (PGLS, estimate:  $-6.596 \pm 1.545$ ,  $n =$   
451  $85$ ,  $t = -4.27$ ,  $p < 0.001$ ), there was no significant relationship between the level of SSD and the  
452 degree of ecological specialization (PDI index) (PGLS;  $t = -1.16$ ,  $p = 0.25$ ).

453       Regarding categorical variables, we did not find significant differences between ground  
454 and plant-perching species in terms of SSD (PhyLANOVA;  $F_{1,83} = 2.72$ ,  $p = 0.51$ ), male body

455 size ( $F_{1,83} = 0.69$ ,  $p = 0.75$ ) or female body size ( $F_{1,83} = 0.02$ ,  $p = 0.96$ ) after controlling for the  
456 shared evolutionary history of species. Lastly, there was a trend towards low altitude species  
457 being larger than those inhabiting medium- and high-altitudes, but differences were not  
458 statistically significant after correcting for phylogeny (PhylANOVA; *female body size*:  $F_{2,66} =$   
459  $8.51$ ,  $p = 0.13$ ; *male body size*:  $F_{2,66} = 6.38$ ,  $p = 0.21$ ) (Fig. 5). The length of the breeding season,  
460 but not the level of SSD, differed significantly among altitude categories (breeding season  
461 length:  $F_{2,66} = 4.22$ ,  $p = 0.018$ ; SSD:  $F_{2,66} = 3.23$ ,  $p = 0.45$ ), being shorter at higher altitudes  
462 (mean  $\pm$  S.D. breeding season length; low-altitude:  $5.83 \pm 1.01$ , medium-altitude:  $5.36 \pm 2.46$ ,  
463 high-altitude:  $4.07 \pm 2.70$  months).

464

465 Allometry of SSD: Do Acrididae grasshoppers conform to Rensch's rule?

466 The degree of SSD was similar across all taxa (all taxa:  $0.801 \pm 0.076$ ) and when considering  
467 the two most speciose subfamilies separately (Gomphocerinae:  $0.808 \pm 0.062$ ; Oedipodinae:  
468  $0.817 \pm 0.076$ ). Our results supported the existence of a pattern consistent with the converse to  
469 Rensch's rule as the relationship of male body size with female body size across all taxa had a  
470 slope less than one (PRMA;  $\beta = 0.895$ , CI: 0.804-0.940). However, we found an isometric  
471 pattern (i.e. the slope did not differ significantly from 1) when data were analyzed separately for  
472 Gomphocerinae (PRMA;  $\beta = 0.898$ , CI: 0.869-1.106) and Oedipodinae (PRMA;  $\beta = 0.866$ , CI:  
473 0.846-1.422).

474

475

## 476 **Discussion**

477 Evolution of body size in a recent radiation

478 The very short branches deep in our phylogeny suggest recent divergence and thus rapid  
479 speciation in some lineages. This is in agreement with the findings of Song et al. (2015), who  
480 suggested that Acrididae may have undergone an explosive adaptive radiation during the  
481 Cenozoic, when global climate became temperate and grasses evolved and became dominant.

482 The evolution of a new niche space (grasslands) may have powered the radiation of  
483 graminivorous species, especially strong fliers like band-winged grasshoppers (Oedipodinae)  
484 (Song et al. 2015). Later, climatic oscillations during the Pleistocene led to thermophilic species  
485 (as most Gomphocerinae are) being restricted to southern refuges during glacial stadials. This  
486 probably resulted in divergent evolution of allopatric populations by geographic isolation  
487 (Taberlet et al. 1998, Hewitt 1999, Mayer et al. 2010). This plausible scenario matches with the  
488 notion raised by Schluter (2000) who noted that “a continuous spread to new environments is  
489 the dominant trend of adaptive radiation”. Although the term adaptive radiation is frequently  
490 used to describe a slowdown in diversification and morphological evolution after an initial  
491 phase of rapid adaptation to vacant ecological niches (‘niche filling’), recent studies stress that  
492 the definition of adaptive radiation should not be conditioned by the existence of early-bursts,  
493 which indeed seem to be uncommon across the tree of life (Harmon et al. 2010, Pincheira-  
494 Donoso et al. 2015). Rather, an adaptive radiation should be defined as the process in which a  
495 single lineage diversifies into a variety of species, occurring at a fast net rate, irrespective of the  
496 timing (Harmon et al. 2010). In this study, model comparison, maximum-likelihood values for  
497 the  $\delta$  parameter (which tests for acceleration *vs.* deceleration) and node-height tests provide no  
498 significant support for an ‘early burst’ followed by a slowdown in morphological evolution in  
499 this taxonomic group. Instead, we found the opposite pattern; the high values of  $\delta$  indicate  
500 recent, high rates of phenotypic divergence whereas the results of the node-height tests indicate  
501 that it increased as the number of taxa increased. This pattern suggests that most divergence  
502 seems to be concentrated later in the evolutionary history of this group (i.e. recent and rapid  
503 diversification; see also Boucher et al. 2012, Edwards et al. 2015).

504       Body size evolution in Iberian Acrididae is inconsistent with a Brownian Motion  
505 process, indicating that selection and not drift underlies body size evolution in this group. Our  
506 results indicate that body size variation is best explained by a time-dependent model (TVR  
507 model; Pagel 1997, 1999). However, across all subfamilies the OU model provided a better fit  
508 to the data suggesting a process of stabilizing selection in which variation of body size revolves  
509 around stationary optimal values. That is, deviant body sizes are “polished” towards an

510 optimum value, which was estimated to be around 9.79 and 13.49 mm for male and female  
511 femur length, respectively. The pattern described for the entire family reflects the existence of  
512 scale-dependent processes that act differentially across stages of the diversification process (see  
513 Ceballos et al. 2013). Overall, this evidences that even in taxonomic groups showing limited  
514 morphological and ecological disparity, natural selection seems to play a more important role  
515 than genetic drift in driving the radiation process.

516

517 Ecological correlates of body size and SSD

518 Although the predominance of female-biased SSD in Acrididae suggests that fecundity selection  
519 may be the most important selective force acting on this family, we failed to find support for  
520 this hypothesis as ovariole number and female body size were not correlated. However, this  
521 specific analysis was performed using a reduced dataset ( $n = 20$ ) and thus, our results should be  
522 interpreted cautiously. Alternatively, it is also likely that fecundity selection acts primarily at  
523 intraspecific level, preventing us to detect its effect through our analyses. Regarding sexual  
524 selection, we failed to find a significant correlation between the relative length of the  
525 stridulatory file (our proxy to measure the strength of sexual selection) and the level of SSD.  
526 This may indicate that sexual selection is not driving SSD in Gomphocerinae or, alternatively,  
527 that this trait does not accurately reflect the strength of this selective force at interspecific level  
528 due to its strong genetic component (Saldamando et al. 2005). The size-corrected length of the  
529 stridulatory apparatus showed a non-phylogenetic signal, supporting the view that in  
530 gomphocerine grasshoppers the value of acoustic characters as an indicator of phylogeny is very  
531 limited despite the fact that they have long been used to resolve taxonomic uncertainties at the  
532 species level (Ragge 1987, Ragge and Reynolds 1988).

533 Substrate use (ground or plant-perching) may be expected to affect body size as  
534 different functional demands between the two types are expected to generate different selective  
535 peaks. However, we did not find evidence for the gravity hypothesis; ground-dwelling species  
536 did not show a significantly larger size than plant-perching species as expected if climbing  
537 ability selects for reduced body size (Moya-Laraño et al. 2012). Thus, we failed to detect strong

538 selection for increased female size (fecundity selection) (see above) or for the maintenance of  
539 small male size (agility hypothesis) in these insects. Regarding the other ecological variable,  
540 habitat specialization (PDI index), we did not find a higher level of SSD in generalist species in  
541 which selection for large male body size should be smaller in comparison with species with  
542 specific habitat requirements and whose populations may be affected by higher intrasexual  
543 competition. A plausible explanation for this result is that male-male competition for food  
544 resources may not be intense enough to boost the evolution of male body size as most species  
545 depend on food resources that are rarely limited (e.g. gramineous). This finding thus reinforces  
546 the view that both inter- and intrasexual competition for food is unlikely in small herbivorous  
547 organisms and that these play a subsidiary role in the evolution of SSD (Fairbarn et al. 2007).

548         Larger-bodied and slower developing arthropods like Orthoptera are expected to be  
549 more affected by seasonal limitations than faster developing insects. Shorter breeding season  
550 lengths should promote life history adaptations leading to smaller body size to facilitate the  
551 completion of the life cycle within the reduced time available for development. When the  
552 developmental time window is short, individuals reach maturity at smaller sizes and develop  
553 faster. When the length of the breeding season is longer, more time is available to reach the  
554 reproductive stage at a larger size (Berner and Blanckenhorn 2006). Contrary to our initial  
555 expectation, we found a lower level of SSD in species with a short phenology. SSD was more  
556 pronounced in species with longer breeding seasons, an effect that seemed to be caused by a  
557 larger difference in size between sexes. It suggests that selection pressure for large body size in  
558 males may be stronger in ephemeral or more seasonal environments (i.e. in species with a short  
559 reproductive window). Alternatively, this result may be due to the fact that in most grasshopper  
560 species the females are more variable in size than males (for example, female size variation is  
561 exceptionally high in *Calliptamus* species), and that unfavorable environmental conditions may  
562 compromise body size (Teder and Tammaru 2005). This indicates that time constraints do not  
563 seem to impose limits for the evolution of male body size (rather the contrary, it seems to be  
564 favored) and that female body size is more sensitive to environment than male size. On the other  
565 hand, our results are consistent with the converse Bergmann's rule; grasshopper body size

566 tended to decrease with elevation but the differences were not statistically significant after  
567 correcting for phylogeny. This pattern is normally explained by the existence of gradients of  
568 precipitation and sun exposure, which are likely indicators of other ecological factors that exert  
569 control on body growth, such as resource availability and conditions for effective  
570 thermoregulation (Laiolo et al. 2013). Although most evidence comes from single-species  
571 studies (Blanckenhorn et al. 2006; Bidau & Martí 2007b, 2008) and thus, our study is one of the  
572 first to test for altitudinal clines in body size at the interspecific level (that is, across species) in  
573 Orthoptera.

574

575 Rensch's rule

576 We found evidence that SSD and body size in short-horned grasshoppers fitted a converse  
577 Rensch's rule: females are proportionally bigger than males in large species. This result is in  
578 agreement with previous studies carried out on a smaller scale (Bidau et al. 2013, Laiolo et al.  
579 2013) and reinforces the view that Rensch's rule is infrequent in taxonomic groups exhibiting  
580 female-biased SSD. When performing our analyses within subfamilies, we neither found a  
581 pattern consistent with Rensch's rule: sizes of males and females scaled isometrically. A  
582 plausible explanation for these results is that if females are more sensitive to environmental  
583 conditions than males, they could achieve a better body size development under more benign  
584 conditions leading to an increase in SSD (Shine 1990, Stilwell et al. 2010). Thereby, Rensch's  
585 rule and its converse would mirror sex-specific environmental sensibility and thus, these  
586 patterns may be considered subproducts of body size variations in relation to ecological  
587 conditions. Thereby, our study supports the idea that the so-called Rensch's rule probably does  
588 not deserve the attribute "rule" at least in arthropods, wherein support for this pattern remains  
589 rather mixed (reviewed in Blanckenhorn et al. 2007a).

590

591 Conclusions

592 Different and complex evolutionary pressures can affect body size evolution in Orthoptera.

593 Fecundity, sexual selection, and predictable, long breeding season environments are thought to

594 select for larger size, whereas time constraints, predators and unpredictable and poor-resource  
595 habitats are thought to select for small body size. Here, we found no support for either the  
596 fecundity or the sexual selection hypothesis, the two primary adaptive forces traditionally  
597 invoked to explain SSD. Nor did we find an effect of substrate -ground vs. plant- on body size  
598 evolution, a factor (agility) that has been suggested to explain why males of certain insect  
599 groups remain small. Our results also reinforce the idea that Rensch's rule is probably not a rule  
600 at all but a limited pattern only found in a few taxonomic groups and more frequently, at the  
601 intraspecific level (e.g. De Lisle and Rowe 2013, Liao et al. 2013, Bidau et al. 2016). Finally,  
602 and contrary to expected, we found a higher level of SSD in species with a long reproductive  
603 window, which is counter to the idea that SSD is favored in short-season habitats due to the fact  
604 that males have no time to fully develop (resulting in small adult sizes). These findings support  
605 laboratory studies at the intraspecific level showing that under poor conditions female  
606 Orthoptera are more strongly affected than males, reducing SSD (Teder and Tammaru 2005).  
607 We conclude that it is unlikely that protandry constitutes the main factor determining the  
608 existence of female-biased SSD in this insect radiation.

609

610

## 611 **References**

- 612 Abouheif E, Fairbairn DJ (1997) A comparative analysis of allometry for sexual dimorphism:  
613 Assessing Rensch's Rule. *American Naturalist*, 149, 540-562.
- 614 Aljanabi SM, Martínez I (1997) Universal and rapid salt-extraction of high quality genomic  
615 DNA for PCR-based techniques. *Nucleic Acids Research*, 25, 4692-4693.
- 616 Anichini M, Kuchenreuther S, Lehmann GUC (2016) Allometry of male sound-producing  
617 structures indicates sexual selection on wing size and stridulatory teeth density in a bushcricket.  
618 *Journal of Zoology*. doi: 10.1111/jzo.12419.

- 619 Beaulieu, J.M., Jhwueng, D.C., Boettiger, C. and O'Meara, B.C. 2012. Modeling stabilizing  
620 selection: expanding the Ornstein-Uhlenbeck model of adaptive evolution. *Evolution* 66: 2369-  
621 2383.
- 622 Berner D, Blanckenhorn WU (2006) Grasshopper ontogeny in relation to time constraints:  
623 adaptive divergence and stasis. *Journal of Animal Ecology*, 75, 130-139.
- 624 Bidau CJ, Martí DA (2007a) Clinal Variation of Body Size in *Dichroplus pratensis* (Orthoptera:  
625 Acrididae): Inversion of Bergmann's and Rensch's Rules. *Annals of the Entomological Society*  
626 of America, 100, 850-860.
- 627 Bidau CJ, Martí DA (2007b) *Dichroplus vittatus* (Orthoptera: Acrididae) follows the converse  
628 to Bergmann's rule although male morphological variability increases with latitude. *Bulletin of*  
629 *Entomological Research*, 97, 67-79.
- 630 Bidau CJ, Martí DA (2008b) Geographic and climatic factors related to a body-size  
631 cline in *Dichroplus pratensis* Bruner, 1900 (Acrididae, Melanoplinae). *Journal of*  
632 *Orthoptera Research*, 17, 149-156.
- 633 Bidau CJ, Martí DA, Castillo RE (2013) Rensch's rule is not verified in melanopline  
634 grasshoppers. *Journal of Insect Biodiversity*, 1, 1-14.
- 635 Bidau CJ, Martínez PA (2016) Sexual size dimorphism and Rensch's rule in Canidae. *Biological*  
636 *Journal of the Linnean Society*, 119, 816-830.
- 637 Bidau CJ, Taffarel A, Castillo ER (2016) Breaking the rule: multiple patterns of scaling of  
638 sexual size dimorphism with body size in orthopteroid insects. *Revista de la Sociedad*  
639 *Entomológica de Argentina*, 75, 11-36.
- 640 Blanckenhorn WU (2000) The evolution of body size: what keeps organisms small? *The*  
641 *Quarterly Review of Biology*, 75, 385-407.
- 642 Blanckenhorn WU, Demont M (2004) Bergmann and converse Bergmann latitudinal clines in  
643 Arthropods: two ends of a continuum? *Integrative and Comparative Biology*, 44, 413-424.



- 644 Blanckenhorn WU, Stillwell RC, Young KA, Fox CW, Ashton KG (2006) When Rensch meets  
645 Bergmann: does sexual size dimorphism change systematically with latitude? *Evolution*, 60,  
646 2004-2011.
- 647 Blanckenhorn WU, Meier R, Teder T (2007a) *Rensch's rule in insects: patterns among and*  
648 *within species*, pp. 60-70. In: Fairbairn DJ, Blackenhorn WU, Székely T (Eds). *Sex, Size and*  
649 *Gender Roles Evolutionary Studies of Sexual Size Dimorphism*. Oxford University Press,  
650 Oxford.
- 651 Blanckenhorn WU, Dixon AF, Fairbairn DJ, Foellmer MW, Gilbert P, van der Linde K, Meier  
652 R, Nylin S, Pitnick S, Schoff C, Signorelli M, Teder T, Wiklund C (2007b) Proximate causes of  
653 Rensch's rule: does sexual size dimorphism in arthropods result from sexual differences in  
654 development time? *American Naturalist*, 169, 245-257.
- 655 Blomberg SP, Garland TJr, Ives AR (2003) Testing for phylogenetic signal in comparative data:  
656 behavioral traits are more labile. *Evolution*, 57, 717-745.
- 657 Boucher FC, Thuiller W, Roquet C, Douzet R, Aubert S, Alvarez N, Lavergne S (2012)  
658 Reconstructing the origins of high-alpine niches and cushion life form in the genus *Androsace*  
659 s.l. (Primulaceae). *Evolution*, 66, 1255-1268.
- 660 Brandt Y, Andrade MCB (2007) Testing the gravity hypothesis of sexual size-dimorphism: are  
661 small males faster climbers? *Functional Ecology*, 21, 379-385.
- 662 Butler MA, King AA (2004) Phylogenetic comparative analysis: a modelling approach for  
663 adaptive evolution. *American Naturalist*, 164, 683-695.
- 664 Ceballos CP, Adams DC, Iverson JB, Valenzuela N (2013) Phylogenetic patterns of sexual size  
665 dimorphism in turtles and their implications for Rensch' rule. *Evolutionary Biology*, 40, 194-  
666 208.
- 667 Chapco W, Contreras D (2011) Subfamilies Acridinae, Gomphocerinae and Oedipodinae are  
668 "fuzzy sets": a proposal for a common African origin. *Journal of Orthoptera Research*, 20, 173-  
669 190.

- 670 Chapman RF, Joern A (1990) *Biology of Grasshoppers*. Wiley and Sons, New York.
- 671 Cheng RC, Kuntner M (2014) Phylogeny suggests nondirectional and isometric evolution of  
672 sexual size dimorphism in argione spiders. *Evolution*, 68, 2861-2872.
- 673 Chown SL, Klok CJ (2003) Altitudinal body size clines: latitudinal effects associated with  
674 changing seasonality. *Ecography*, 26, 445-455.
- 675 Contreras D, Chapco W (2006) Molecular phylogenetic evidence for multiple dispersal events  
676 in gomphocerines grasshoppers. *Journal of Orthoptera Research*, 15, 91-98.
- 677 Cueva del Castillo R, Núñez-Farfán J (1999) Sexual selection on maturation time and body size  
678 in *Sphenarium purpurascens* (Orthoptera: Pyrgomorphidae): correlated response to selection.  
679 *Evolution*, 53, 209-215.
- 680 Darwin CR (1871) *The descent of man and selection in relation to sex*. John Murray, London.
- 681 De Lisle SP, Rowe L. 2013. Correlated evolution of allometry and sexual dimorphism across  
682 higher taxa. *American Naturalist*, 182, 630-639.
- 683 Defaut B, Morichon D (2015) *Criquets de France* (Orthoptera, Caelifera). Faune de France,  
684 Fédération Française des Sociétés de Sciences Naturelles, Paris 97, 695 pp. + XXI plates.
- 685 Devictor V, Clavel J, Julliard R, Lavergne S, Mouillot D, Thuiller W, Venail P, Villéger S,  
686 Mouquet N (2010) Defining and measuring ecological specialization. *Journal of Applied*  
687 *Ecology*, 47, 15-25.
- 688 Dormann CF, Fruend J, Gruber B (2016) *bipartite*: Visualising Bipartite Networks and  
689 Calculating Some (Ecological) Indices. [https://cran.r-](https://cran.r-project.org/web/packages/bipartite/index.html)  
690 [project.org/web/packages/bipartite/index.html](https://cran.r-project.org/web/packages/bipartite/index.html)
- 691 Drummond AJ, Suchard MA, Xie D, Rambaut A (2012) Bayesian phylogenetics with BEAUti  
692 and the BEAST 1.7. *Molecular Biology and Evolution*, 29, 1969-1973.
- 693 Edwards DL, Melville J, Joseph L, Keogh JS (2015) Ecological Divergence, Adaptive  
694 Diversification, and the Evolution of Social Signaling Traits: An Empirical Study in Arid  
695 Australian Lizards. *American Naturalist*, 186, 144-161.

- 696 Elgar MA (1991) Sexual cannibalism, size dimorphism, and courtship behavior in orb-weaving  
697 spiders (Araneidae). *Evolution*, 45, 444-448.
- 698 Felsenstein J (1985) Phylogenies and the comparative method. *American Naturalist*, 125, 1-15.
- 699 Fairbairn DJ (1997) Allometry for sexual size dimorphism: pattern and process in the  
700 coevolution of body size in males and females. *Annual Review of Ecology and Systematics*, 28,  
701 659-687.
- 702 Fairbairn DJ (2013) *Odd Couples. Extraordinary differences between the sexes in the animal*  
703 *kingdom*. Princeton University Press.
- 704 Fairbairn DJ, Blanckenhorn WU, Székely T (2007) *Sex, size and gender roles. Evolutionary*  
705 *studies of sexual size dimorphism* . Oxford University Press, Oxford.
- 706 Freckleton RP, Harvey PH (2006) Detecting non-Brownian trait evolution in adaptive  
707 radiations. *PLoS Biology*, 4, 2104–2111.
- 708 Fries M, Chapco W, Contreras D (2007) A molecular phylogenetic analysis of the Oedipodinae  
709 and their intercontinental relationships. *Journal of Orthoptera Research*, 16, 115-125.
- 710 Gaunt MW, Miles MA (2002) An insect molecular clock dates the origin of the insects and  
711 accords with palaeontological and biogeographic landmarks. *Molecular Biology and Evolution*,  
712 74, 748-761.
- 713 Guindon S, Gascuel O (2006) A simple, fast and accurate algorithm to estimate large  
714 phylogenies by maximum likelihood. *Systematic Biology*, 52, 696-704.
- 715 Hansen TF (1997) Stabilizing selection and the comparative analysis of adaptation. *Evolution*,  
716 51, 1341-1351.
- 717 Harmon LJ, Schulte II JALarson A, Losos JB (2003) Tempo and mode of evolutionary radiation  
718 in iguanian lizards. *Science*, 301, 961-964.
- 719 Harmon LJ, Weir J, Brock C, Glor RE, Challenger W (2008) GEIGER : Investigating  
720 evolutionary radiations. *Bioinformatics*, 24, 129-131.

- 721 Harmon LJ, Losos JB, Davies J, Gillespie RG, Gittleman JL, Jennings WB, Kozak K, McPeck  
722 MA, Moreno-Roark F, Near TJ, Purvis A, Ricklefs RE, Schluter D, Schulte II JA, Seehausen O,  
723 Sidlauskas B, Torres-Carvajal O, Weir JT, Mooers AØ (2010) Early bursts of body size and  
724 shape evolution are rare in comparative data. *Evolution*, 64, 2385-2396.
- 725 Harz K (1975) *Orthopteren Europas/The Orthoptera of Europe* Vol. II. Dr. W. Junk, The  
726 Hague.
- 727 Hernández CE, Rodríguez-Serrano E, Avaria-Llautureo J, Inostroza-Michael O, Morales-Pallero  
728 B, Boric-Bargetto D, Canales-Aguirre CB, Marquet PA, Meade A (2013) Using phylogenetic  
729 information and the comparative method to evaluate hypotheses in macroecology. *Methods in*  
730 *Ecology and Evolution*, 4, 401-415.
- 731 Hewitt GM (1999) Post-glacial re-colonization of European biota. *Biological Journal of*  
732 *Linnean Society*, 68, 87-112.
- 733 Hochkirch A, Gröning J (2008) Sexual size dimorphism in Orthoptera (sens. str.) - a review.  
734 *Journal of Orthoptera Research*, 17, 189-196.
- 735 Hormiga G, Scharff N, Coddington J (2000) The phylogenetic basis of sexual size dimorphism  
736 in orb-weaving spiders (Araneae, Orbiculariae). *Systematic Biology*, 49, 435-462.
- 737 Hughes J, Vogler AP (2004) The phylogeny of acorn weevils (genus *Curculio*) from  
738 mitochondrial and nuclear DNA sequences: the problem of incomplete data. *Molecular*  
739 *Phylogenetics and Evolution*, 32, 601-615.
- 740 Husemann M, Depperman J, Hochkirch A (2014) Multiple independent colonization of the  
741 Canary Islands by the winged grasshopper genus *Sphingonotus* Fieber, 1852. *Molecular*  
742 *Phylogenetics and Evolution*, 81, 174-181.
- 743 Guindon S, Gascuel O (2006) A simple, fast and accurate algorithm to estimate large  
744 phylogenies by maximum likelihood. *Systematic Biology*, 52, 696-704.
- 745 Jago ND (1971). A review of the Gomphocerinae of the world with a key to the genera  
746 (Orthoptera, Acrididae). *Proceedings of the Academy of Natural Sciences of Philadelphia*,

- 747 123, 205-343.
- 748 Ingrisch S, Köhler G (1998) *Die Heuschrecken Mitteleuropas*. Westarp Wissenschaften,  
749 Magdeburg, 460 p.
- 750 Katoh K, Standley DM (2013) MAFFT Multiple Sequence Alignment Software Version  
751 7: Improvements in Performance and Usability. *Molecular Biology and Evolution*, 30,  
752 772-780.
- 753 Kuntner M, Coddington JA (2009) Discovery of the largest orbweaving spider species: the  
754 evolution of gigantism in *Nephila*. *PLoS ONE* 4: e7516.
- 755 Kuntner M, Elgar MA (2014) Evolution and maintenance of sexual size dimorphism: aligning  
756 phylogenetic and experimental evidence. *Frontiers in Ecology and Evolution*, 2, 26.
- 757 Laiolo P, Illera JC, Obeso JR (2013) Local climate determines intra- and interspecific variation  
758 in sexual size dimorphism in mountain grasshopper communities. *Journal of Evolutionary*  
759 *Biology*, 26, 2171-2183.
- 760 Liao WB, Zeng Y, Zhou CQ, Jehle R (2013) Sexual size dimorphism in anurans fails to obey  
761 Rensch's rule. *Frontiers in Zoology*, 10, 10.
- 762 Lluçia Pomares D (2002) Revisión de los ortópteros (Insecta: Orthoptera) de Cataluña (España).  
763 Monografías SEA, vol. 7. 426 pp.
- 764 Lovich JE, Gibbons JW (1992) A review of techniques for quantifying sexual size dimorphism.  
765 *Growth, Development & Aging*, 56, 269-281.
- 766 Maddison WP, Maddison DR (2015) Mesquite: a modular system for evolutionary analysis.  
767 Version 3.04. <http://mesquiteproject.org>.
- 768 Masaki S (1967) Geographic variation and climatic adaptation in a field cricket (Orthoptera:  
769 Gryllidae). *Evolution*, 21, 725-741.
- 770 Mayer F, Berger D, Gottsberger B, Schulze W (2010) *Non-Ecological Radiations in*  
771 *Acoustically Communicating Grasshoppers?* In: Glaubrecht M (Ed.) *Evolution in Action. Case*

- 772 *studies in Adaptive Radiation, Speciation and the Origin of Biodiversity*. Springer Verlag,  
773 Berlin.
- 774 Mayr E (1956) Geographical character gradients and climatic adaptation. *Evolution*, 10, 105-  
775 108.
- 776 Midford PE, Garland T Jr., Maddison WP (2005) PDAP Package of Mesquite. Version 1.07.  
777 [http://mesquiteproject.org/pdap\\_mesquite/](http://mesquiteproject.org/pdap_mesquite/)
- 778 Montealegre-Z, F (2009) Scale effects and constraints for sound production in katydids  
779 (Orthoptera: Tettigoniidae): correlated evolution between morphology and signal parameters.  
780 *Journal of Evolutionary Biology*, 22, 355-366.
- 781 Morrison DA (2007) Increasing the efficiency of searches for the maximum likelihood tree in a  
782 phylogenetic analysis of up to 150 nucleotide sequences. *Systematic Biology*, 56, 988-1010.
- 783 Moya-Laraño J, Halaj J, Wise DH (2002) Climbing to reach females: Romeo should be small.  
784 *Evolution*, 56, 420-425.
- 785 Nattier R, Robillard T, Amedegnato C, Couloux A, Cruaud C, Desutter-Grandcolas L (2011)  
786 Phylogeny and evolution of acoustic communication in Gomphocerinae (Orthoptera: Caelifera:  
787 Acrididae). *Zoologica Scripta*, 40, 479-497.
- 788 Orme D (2013) CAPER: Comparative Analyses of Phylogenetics and Evolution in R. ver. 0.52.  
789 <<http://cran.r-project.org/web/packages/caper>>
- 790 Ortego J, Aguirre MP, Cordero PJ (2010) Population genetics of *Mioscirtus wagneri*, a  
791 grasshopper showing a highly fragmented distribution. *Molecular Ecology*, 19, 472-483.
- 792 Ortego J, Aguirre MP, Cordero PJ (2012) Genetic and morphological divergence at different  
793 spatiotemporal scales in the grasshopper *Mioscirtus wagneri*. *Journal of Insect Conservation*,  
794 16, 103-110.

- 795 Ortego J, García-Navas V, Nogueras V, Cordero PJ (2015) Discordant patterns of genetic and  
796 phenotypic differentiation in five grasshopper species co-distributed across a microreserve  
797 network. *Molecular Ecology*, 24, 5796-5812.
- 798 Olmo-Vidal JM (2006) *Atlas del Ortópteros de Catalunya i llibre vermell*. Generalitat de  
799 Catalunya. Departament de Mediambient i Habitatge. Barcelona. 428 pp.
- 800 Pagel M (1997) Inferring evolutionary processes from phylogenies. *Zoologica Scripta* 26, 331-  
801 348.
- 802 Pagel MD (1999) Inferring the historical patterns of biological evolution. *Nature*, 401, 877-884.
- 803 Paradis E, Claude J, Strimmer K (2014) APE: analyses of Phylogenetics and Evolution in R  
804 language. *Bioinformatics*, 20, 289-290.
- 805 Parent CE, Agashe D, Bolnick DI (2013) Intraspecific competition reduces niche width in  
806 experimental populations. *Ecology and Evolution*, 20, 3978-3990.
- 807 Pardo JE, Gómez R (1995) Orthopteroidea de los sistemas montañosos de Castilla-La Mancha  
808 (España). III. Caelifera. *Anales de Biología*, 20, 7-46.
- 809 Pardo JE, Gómez R, Cerro A (1991) Claves de determinación de los Orthopteroidea de los  
810 principales sistemas montañosos de Castilla-La Mancha. *AlBasit: Revista de Estudios*  
811 *Albacetenses*, 29, 119-193.
- 812 Pascual F (1978) Estudio preliminar de los Ortópteros de Sierra Nevada. II. Claves para la  
813 determinación de especies. *Trabajos Monográficos del Departamento Zoología de la*  
814 *Universidad de Granada*, 1, 1-63.
- 815 Pincheira-Donoso D, Harvey LP, Ruta M (2015) What defines an adaptive radiation?  
816 macroevolutionary diversification dynamics of an exceptionally species-rich continental lizard  
817 radiation. *BMC Evolutionary Biology*, 15, 153.
- 818 Pincheira-Donoso D, Hunt J (2016) Fecundity selection theory: concepts and evidence.  
819 *Biological Reviews*, 91, *in press*.

820 Poisot T, Bever JD, Nemri A, Thrall PH, Hochberg ME (2011) A conceptual framework for the  
821 evolution of ecological specialisation. *Ecology Letters*, 14, 841-851.

822 Poisot T, Thrall PH, Hochberg ME (2012) Trophic network structure emerges through  
823 antagonistic coevolution in temporally varying environments. *Proceedings of the Royal Society*  
824 *B: Biological Sciences*, 279, 299-308.

825 Posada D (2008) jModelTest: phylogenetic model averaging. *Molecular Biology and Evolution*,  
826 25, 1253-1256.

827 Presa JJ, García MD, Clemente, ME (2007). Catalogue of Orthoptera Caelifera from the Iberian  
828 Peninsula and Balearic Islands (Orthoptera: Caelifera). *Journal of Orthoptera Research*, 16, 175-  
829 179.

830 Pybus OG, Harvey PH (2000) Testing macroevolutionary models using incomplete molecular  
831 phylogenies. *Proceedings of the Royal Society of London B* 267, 2267-2272.

832 Rabosky DL (2006) LASER: a maximum likelihood toolkit for detecting temporal shifts in  
833 diversification rates from molecular phylogenies. *Evolutionary Bioinformatics*, 2, 247-250.

834 Ragge DR (1987). The song of the western European grasshoppers of the genus *Stenobothrus* in  
835 relation to their taxonomy (Orthoptera: Acrididae). *Bulletin of the British Museum (Natural*  
836 *History) Entomology*, 55, 393-424.

837 Ragge DR, Reynolds WJ (1988) Songs and taxonomy of the grasshoppers of the *Chortippus*  
838 *biguttulus* group in the Iberian peninsula (Orthoptera: Acrididae). *Journal of Natural History*,  
839 22, 897-929.

840 Rambaut A (2009) FigTree version 1.3.1. <<http://tree.bio.ed.ac.uk/software/figtree/>>.

841 Rambaut A, Drummond AJ (2009) Tracer v1.5. <<http://beast.bio.ed.ac.uk/Tracer>>

842 Reinhardt K, Köhler G, Maas S, Detzel P (2005) Low dispersal ability and habitat specificity  
843 promote extinctions in rare but not in widespread species: the Orthoptera of Germany.  
844 *Ecography*, 28, 593-602.



- 845 Rensch B (1950) Die Abhängigkeit der relativen sexualdifferenz von der Körpergröße. *Bonner*  
846 *Zoologische Beiträge*, 1, 58-69.
- 847 Revell LJ (2010) Phylogenetic signal and linear regression on species data. *Methods in Ecology*  
848 *and Evolution*, 1, 319-329.
- 849 Revell LJ (2011) *Phytools*: An R package for phylogenetic comparative biology (and other  
850 things). *Methods in Ecology and Evolution*, 3, 217-223.
- 851 Roff D (1980) Optimizing development time in a seasonal environment: the ups and downs of  
852 clinal variation. *Oecologia*, 45, 202-208.
- 853 Ronquist F, Teslenko M, van der Mark P, Ayres DL, Darling A, Höhna S, Larget B, Liu L,  
854 Suchard MA, Huelsenbeck JP (2012) MrBayes 3.2: efficient Bayesian phylogenetic inference  
855 and model choice across a large model space. *Systematic Biology*, 61, 539-542.
- 856 Saldamando CI, Miyaguchi S, Tatsuta H, Kishino H, Bridle JR, Butlin RK (2005) Inheritance of  
857 song and stridulatory peg number divergence between *Chorthippus brunneus* and *C. jacobsi*,  
858 two naturally hybridizing grasshopper species (Orthoptera: Acrididae). *Journal of Evolutionary*  
859 *Biology*, 18, 703-712.
- 860 Sanabria-Urbán S, Song H, Oyama K, González-Rodríguez A, Serrano-Meneses MA, Cueva del  
861 Castillo R (2015) Body Size Adaptations to Altitudinal Climatic Variation in Neotropical  
862 Grasshoppers of the Genus *Sphenarium* (Orthoptera: Pyrgomorphidae). *PLoS One*, 11,  
863 e0148329.
- 864 Schluter D (2000) *The ecology of adaptive radiation*. Oxford Univ. Press, Oxford.
- 865 Schultner E, Blanchet E, Pagès C, Lehmann GUC, Lecoq M (2012) Development, reproductive  
866 capacity and diet of the Mediterranean grasshopper *Arcyptera brevipennis vicheti* Harz 1975  
867 (Orthoptera: Caelifera: Acrididae: Gomphocerinae). *Annales de la Société Entomologique de*  
868 *France*, 48, 299-307.
- 869 Shelomi M (2012) Where are we now? Bergmann's rule *sensu lato* in insects. *American*  
870 *Naturalist*, 180, 511-519.

- 871 Shine R (1990) Proximate determinants of sexual differences in adult body size. *American*  
872 *Naturalist*, 135, 278-283.
- 873 Song H, Amédégno C, Cigliano MM, Desutter-Grandcolas L, Heads SW, Huang Y, Otte D,  
874 Whiting MF (2015) 300 million years of diversification: Elucidating the patterns of orthopteran  
875 evolution based on comprehensive taxon and gene sampling. *Cladistics*, 31, 621-651.
- 876 Stauffer, TW, Whitman, DW (1997) *Grasshopper oviposition*. In: Gangwere SK, Muralirangan  
877 MC, Muralirangan M (Eds.) *The Bionomics of Grasshoppers, Katydid and Their Kin*. Pp. 231-  
878 280. CAB International, UK.
- 879 Stilwell, RC, Blanckenhorn WU, Teder T, Davidowitz G, Fox CW (2010) Sex differences in  
880 phenotypic plasticity affect variation in sexual size dimorphism in insects: from physiology to  
881 evolution. *Annual Review of Entomology*, 55, 227-245.
- 882 Swofford DL (2002) PAUP\*. Phylogenetic Analysis Using Parsimony (\*and Other Methods).  
883 Version 4. Sinauer Associates, Sunderland, Massachusetts.
- 884 Taberlet P, Fumagalli L, Wust-Sauc AG, Cosson JF (1998) Comparative phylogeography and  
885 postglacial colonization routes in Europe. *Molecular Ecology*, 7, 453-464.
- 886 Taylor BJ, Whitman DW (2010) A test of three hypotheses for ovariole number determination  
887 in the grasshopper *Romalea microptera*. *Physiological Entomology*, 35, 214-221.
- 888 Teder T, Tammaru T (2005) Sexual size dimorphism within species increases with body size in  
889 insects. *Oikos*, 108, 321-334.
- 890 Vaidya G, Lohman DJ, Meier R (2011) SequenceMatrix: concatenation software for the fast  
891 assembly of multi-gene datasets with character set and codon information. *Cladistics*, 27, 171-  
892 180.
- 893 Warton DI, Duursma RA, Falster DS, Taskinen S (2012) smatr 3- an R package for estimation  
894 and inference about allometric lines. *Methods in Ecology and Evolution*, 3, 257-259.

895 Webb TJ, Freckleton RP (2007) Only half right: species with female-biased sexual size  
896 dimorphism consistently break Rensch' rule. PLoS One, 2, e897.

897 Whitman DW (2008) The significance of body size in the Orthoptera: a review. Journal of  
898 Orthoptera Research, 17, 117-134.

899 von Helversen O, von Helversen D (1994) Forces driving evolution of song and song  
900 recognition in grasshoppers. In: K. Schildberger & N. Elsner (Eds) *Neural Basis of Behavioural*  
901 *Adaptations* (pp. 253-284). Stuttgart: Fischer.

902 Yan ZC, Chen YL (1997) Studies on the individual size group and the life form of grasshoppers  
903 in typical steppe of Inner Mongolia, China; Acta Ecol Sinica, 17, 666–670.

904 Zwickl DJ (2006) Genetic algorithm approaches for the phylogenetic analysis of large  
905 biological sequence datasets under the maximum likelihood criterion. PhD thesis, University of  
906 Texas, Austin, USA.

907



909 Figure captions

910

911 **Fig. 1.** Variation in degree of sexual size dimorphism (SSD) and length of the breeding season  
912 (LBS, in months) among the studied Acrididae species (in the SSD scatterplot species belonging  
913 to the same subfamily are indicated with the same color). Color of dots next to tips in the tree  
914 denotes the main substrate used by each species (black dots: ground; white dots: plant).

915

916 **Fig. 2.** Relative disparity plots for short-horned grasshoppers compared with expected disparity  
917 based on phylogenetic simulations. The continuous line shows the actual pattern of phenotypic  
918 disparity (graphs are color-coded according to sex; pink color: female body size, blue color:  
919 male body size) and the dotted line represents the median result of Brownian model simulations  
920 (1 000 simulations). Time is relative to phylogenetic depth from the base of the phylogeny on  
921 the left to the terminal tips on the right.

922

923 **Fig. 3.** Reconstructed evolution of sexual size dimorphism (sexual size dimorphism ratio, with  
924 lower values indicating more dimorphic species and higher values indicating less dimorphic  
925 species, so 1 denotes monomorphism) and relative (size-corrected) length of the stridulatory file  
926 (length of the stridulatory file/femur length\*100) in the grasshopper subfamily Gomphocerinae.  
927 Colors denote size classes (see legends).

928

929 **Fig.4.** Relationship between sexual size dimorphism and the length of the breeding season  
930 represented in the form of standardised phylogenetic independent contrasts (PICs).

931

932 **Fig. 5.** Differences in average male (blue dots) and female (pink dots) body size between  
933 grasshopper species inhabiting low (<800 m a.s.l.,  $n = 18$ ), medium (800-1500 m,  $n = 25$ ) and  
934 high-altitudes (>1500 m,  $n = 26$ ) ( $n = 18, 25, \text{ and } 26$ , respectively).

935 **Table 1.** Relative support for alternative evolutionary models of male and female body size in short-horned grasshoppers. BM: Brownian Motion; OU:  
 936 Ornstein-Uhlenbeck; EB: early-burst; TVR: time-variant rate model.  $\sigma^2$  denotes the estimated reproductive rate for each sex. AICc, corrected Akaike's  
 937 information criterion (AIC) value; AICw, AICc weight. The best-fit model/s is/are highlighted in bold type.

938

|               |        | 939           |              |            |                |              |            |               |              |            |                |              |            |
|---------------|--------|---------------|--------------|------------|----------------|--------------|------------|---------------|--------------|------------|----------------|--------------|------------|
| Sex           |        | BM            |              |            | OU             |              |            | EB            |              |            | TVR            |              | 940        |
|               |        | AICc          | AICw         | $\sigma^2$ | AICc           | AICw         | $\sigma^2$ | AICc          | AICw         | $\sigma^2$ | AICc           | AICw         | $\sigma^2$ |
| All taxa      | Male   | -152.94       | 0.135        | 0.240      | <b>-156.01</b> | <b>0.627</b> | 0.264      | -150.79       | 0.191        | 0.240      | -153.63        | 0.191        | 0.159      |
|               | Female | -134.22       | 0.109        | 0.299      | <b>-136.82</b> | <b>0.398</b> | 0.332      | -132.07       | 0.037        | 0.299      | <b>-137.08</b> | <b>0.455</b> | 0.191      |
| Gomphocerinae | Male   | -102.20       | 0.097        | 0.323      | -102.24        | 0.099        | 0.334      | -99.92        | 0.031        | 0.323      | <b>-106.33</b> | <b>0.771</b> | 0.130      |
|               | Female | -91.85        | 0.002        | 0.400      | -92.15         | 0.002        | 0.413      | -89.57        | 0.001        | 0.400      | <b>-104.56</b> | <b>0.995</b> | 0.233      |
| Oedipodinae   | Male   | <b>-33.43</b> | <b>0.603</b> | 0.003      | -30.73         | 0.156        | 0.003      | -30.74        | 0.144        | 0.001      | -30.76         | 0.095        | 0.004      |
|               | Female | <b>-32.33</b> | <b>0.439</b> | 0.001      | -29.62         | 0.113        | 0.001      | <b>-31.38</b> | <b>0.274</b> | 0.002      | <b>-30.46</b>  | <b>0.172</b> | 0.006      |

946

947 Figure 1

948

949

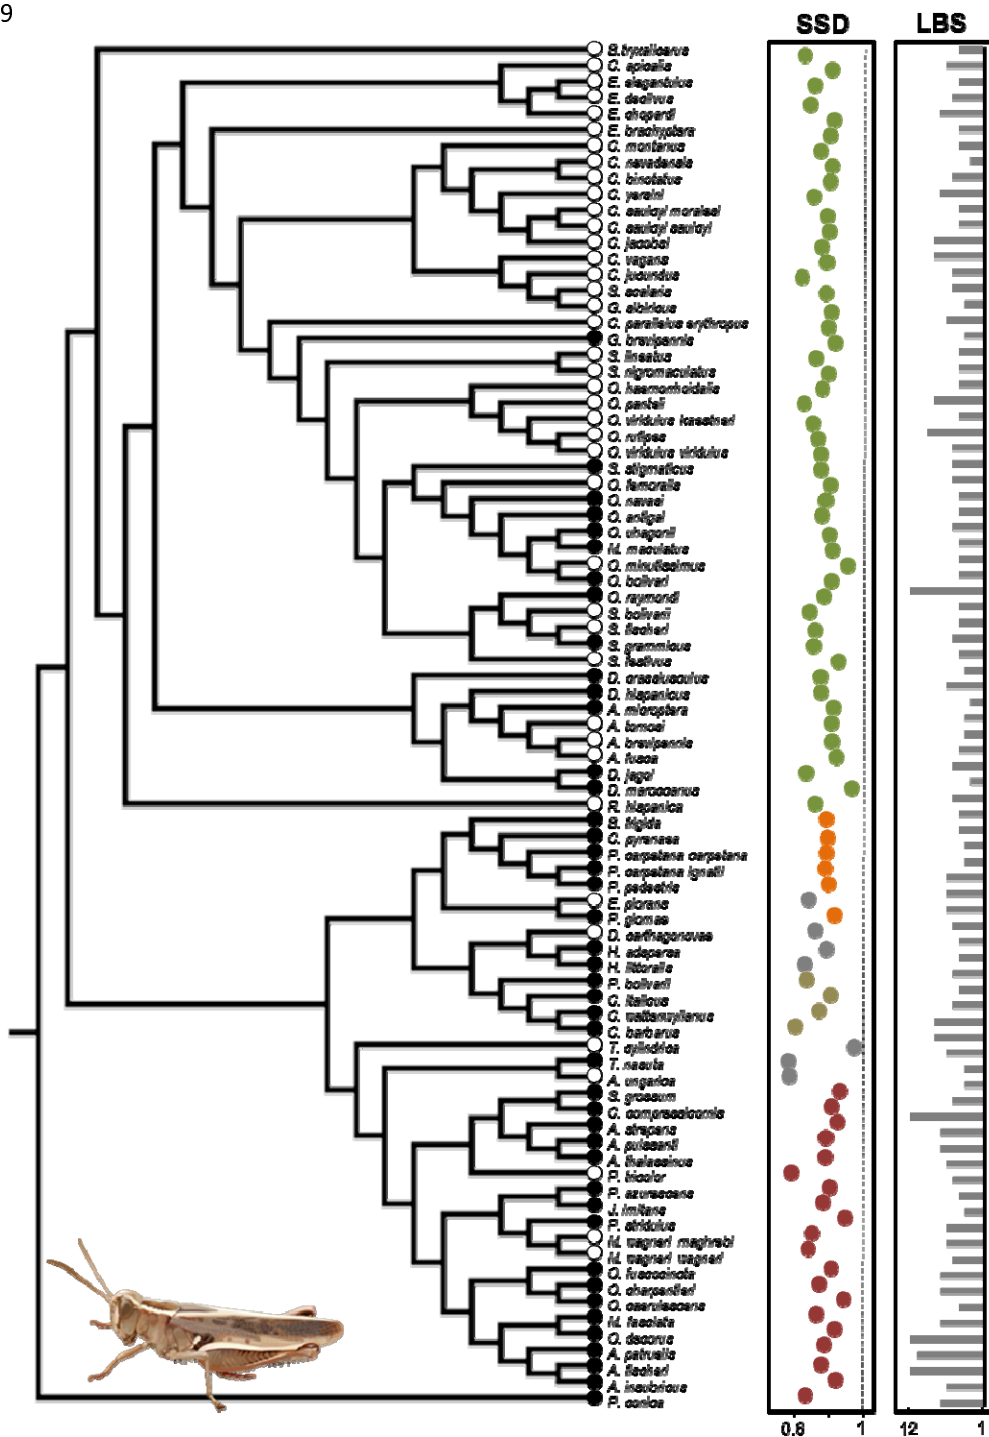

950 Figure 2

951

952

953

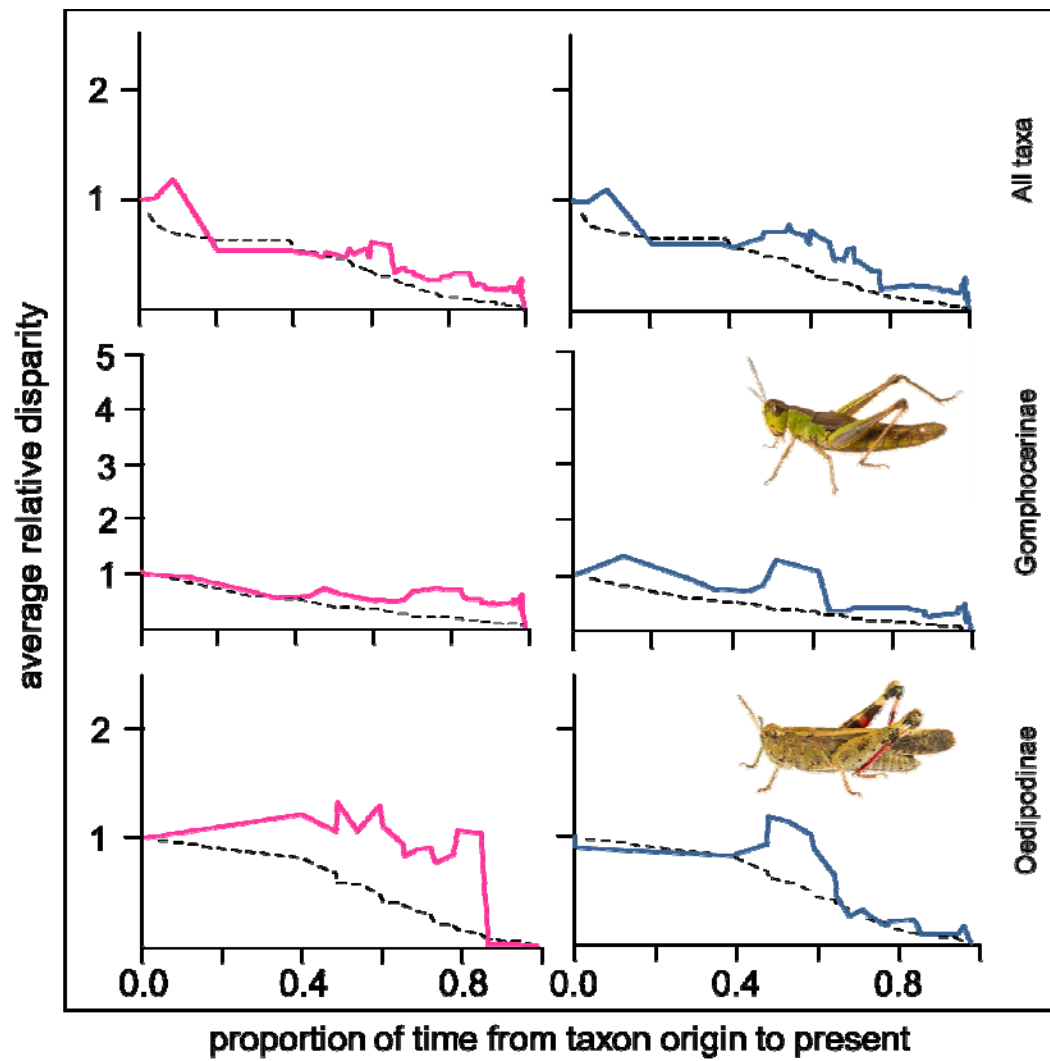



954 Figure 3

955

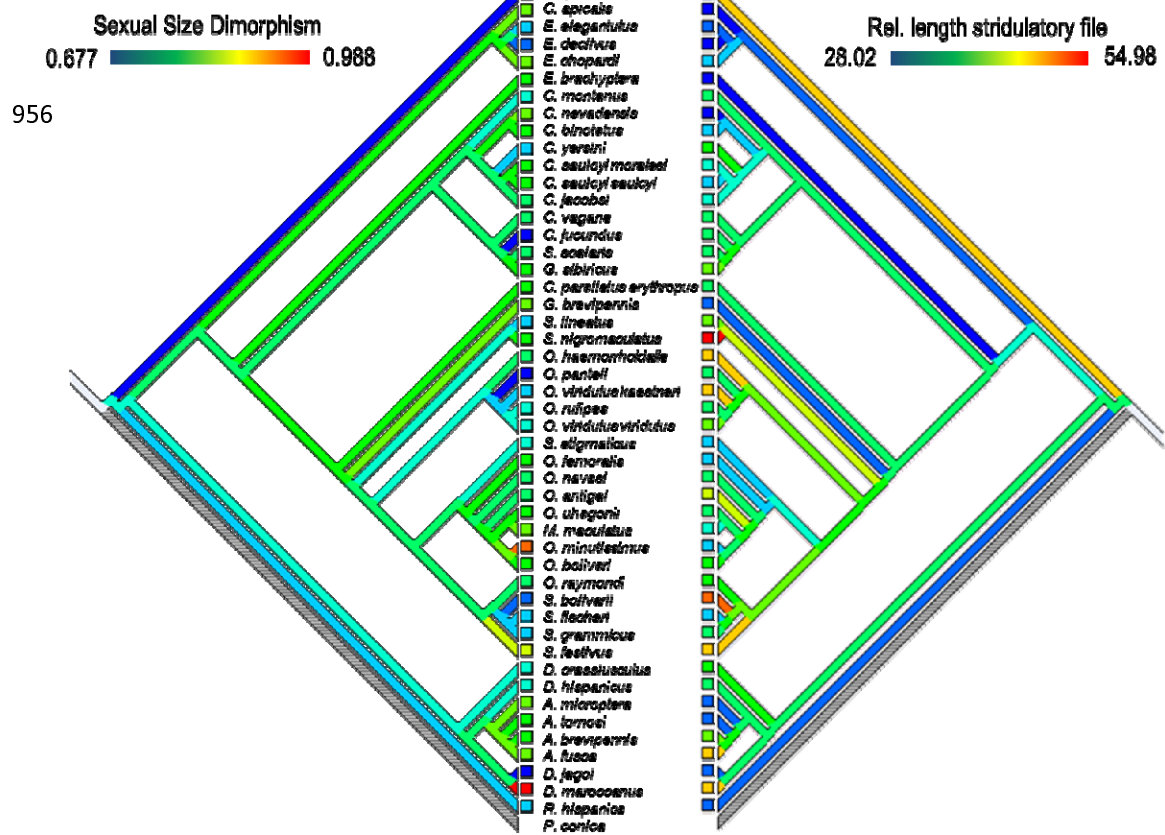

957 Figure 4

958

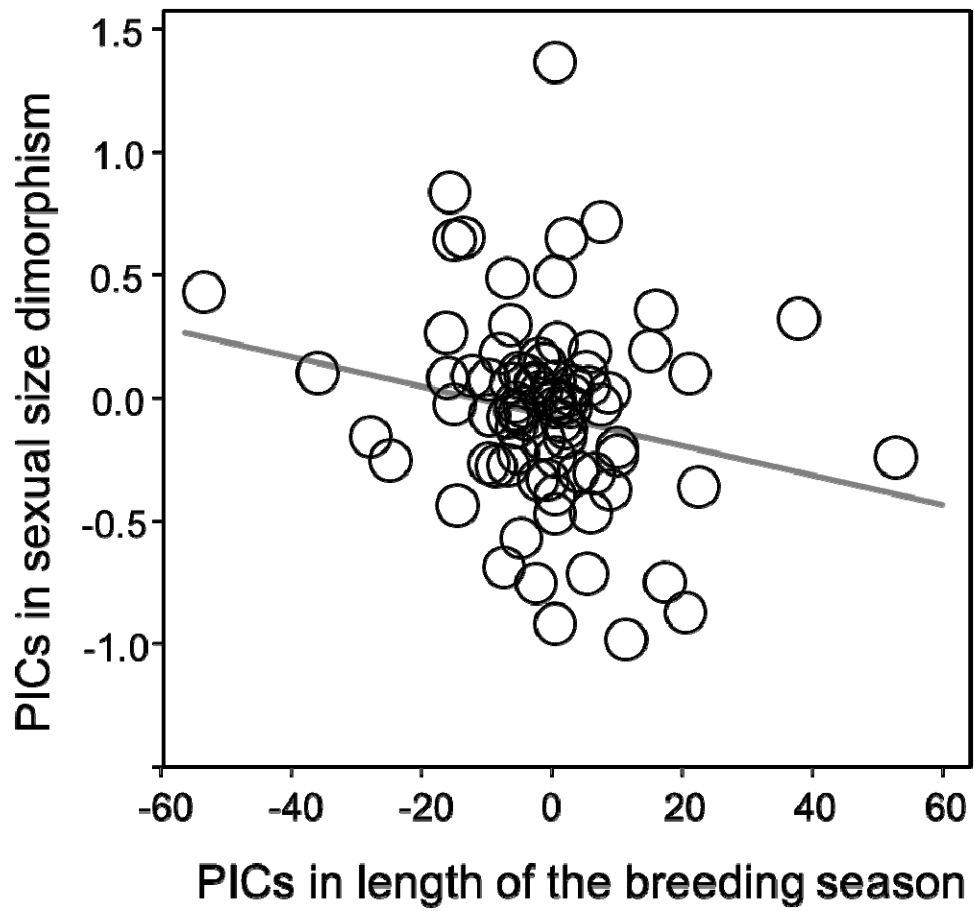

959 Figure 5

960

961

962

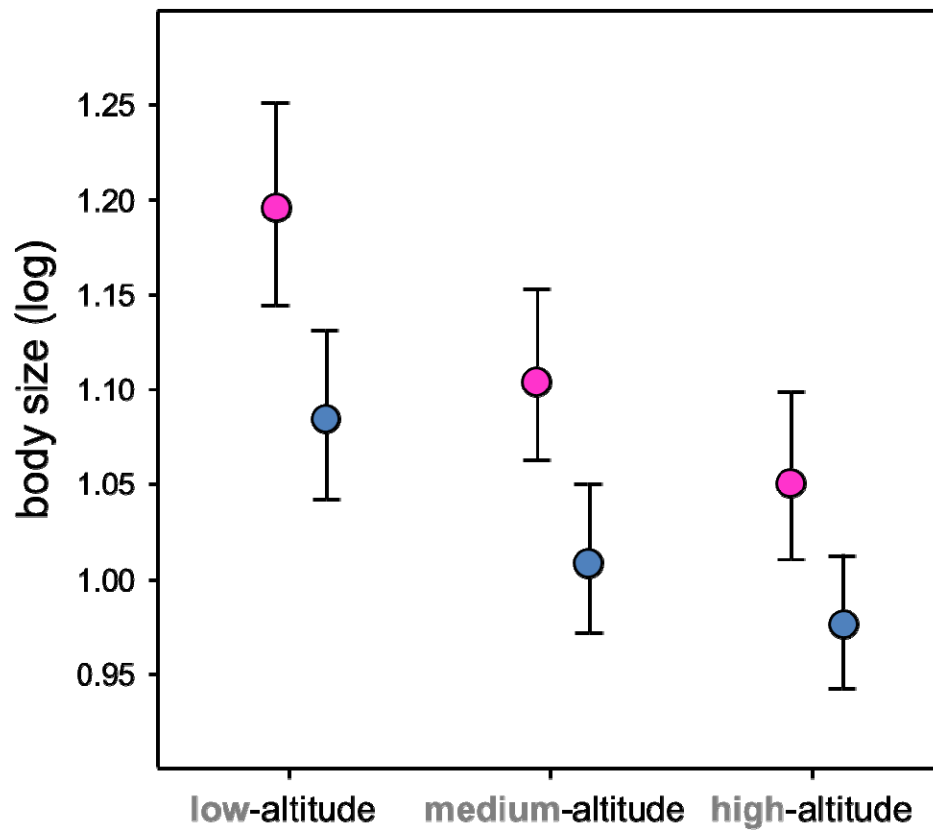

963

964

**SUPPORTING INFORMATION FOR:**

965

966 **Ecological drivers of body size evolution and sexual size dimorphism in**

967 **short-horned grasshoppers (Orthoptera: Acrididae)**

968

969

970

971

972

973

974

975

976

977

978

979

980

981

982

983

984

985

986

987

988

989 Table captions and figure legends

990

991 **Table S1.** Information on body size (male and female femur length, mm), length of the breeding  
992 season (months), substrate and altitude range for Iberian short-horned grasshoppers (Acrididae).

993 **Table S2.** Habitat requirements and ‘Paired Difference Index’ (PDI) values computed for the 85  
994 grasshopper species included in this study.

995 **Table S3.** Association of each grasshopper species with the nine most common habitats in  
996 which these can be found, where 0 = species not recorded in the habitat, 1 = minor association,  
997 2 = moderate association, and 3 = strong association between the species and the habitat.

998 **Fig. S1.** The Bayesian maximum clade credibility (MCC) tree. .

999

1000 Table S2

| Taxa                                  | Male size | Female size | Breeding season length | Substrate | Altitude range |           |
|---------------------------------------|-----------|-------------|------------------------|-----------|----------------|-----------|
| <i>Acrida ungarica mediterranea</i>   | 22.40     | 37.33       | Ago-Oct                | 3         | Plant          | 0-900     |
| <i>Acrotylus insubricus</i>           | 9.37      | 10.72       | Jan-Dec                | 12        | Ground         | 700-1500  |
| <i>Acrotylus fischeri</i>             | 8.39      | 10.64       | Feb-Dec                | 11        | Ground         | 700-1800  |
| <i>Acrotylus patruelis</i>            | 9.01      | 11.18       | Jan-Dec                | 12        | Ground         | 0-700     |
| <i>Aiolopus puissanti</i>             | 10.70     | 13.10       | May-Nov                | 7         | Ground         | 0-700     |
| <i>Aiolopus strepens</i>              | 11.07     | 12.50       | Jan-Dec                | 12        | Ground         | 0-1300    |
| <i>Aiolopus thalassinus</i>           | 9.63      | 11.83       | May-Nov                | 7         | Ground         | 0-700     |
| <i>Arcyptera fusca</i>                | 16.39     | 18.62       | Jul-Oct                | 4         | Ground         | 1300-2500 |
| <i>Arcyptera microptera</i>           | 14.50     | 16.85       | Jun-Jul                | 2         | Ground         | 0-300     |
| <i>Arcyptera tornosi</i>              | 14.92     | 17.58       | Jun-Ago                | 3         | Plant          | 1000-1900 |
| <i>Arcyptera brevipennis</i>          | 13.50     | 15.84       | Jun-Ago                | 3         | Plant          | 800-1600  |
| <i>Bohemanella frigida</i>            | 8.78      | 10.71       | Jul-Oct                | 4         | Ground         | 2000-3000 |
| <i>Brachycrotaphus tryxalicerus</i>   | 8.60      | 12.36       | Jul-Oct                | 4         | Plant          | 0-800     |
| <i>Calephorus compressicornis</i>     | 8.32      | 9.80        | Jun-Oct                | 5         | Ground         | 0-800     |
| <i>Calliptamus barbarus</i>           | 8.84      | 13.88       | May-Nov                | 8         | Ground         | 0-2000    |
| <i>Calliptamus italicus</i>           | 11.50     | 13.65       | Jul-Oct                | 4         | Ground         | 200-1600  |
| <i>Calliptamus wattenwylanus</i>      | 11.20     | 14.40       | Jun-Oct                | 5         | Ground         | 600-1100  |
| <i>Chorthippus apicalis</i>           | 11.28     | 13.20       | Apr-Sep                | 6         | Plant          | 0-1100    |
| <i>Chorthippus binotatus</i>          | 10.41     | 12.31       | Jun-Oct                | 5         | Plant          | 0-2500    |
| <i>Chorthippus jucundus</i>           | 12.22     | 18.05       | Jun-Oct                | 5         | Plant          | 200-2300  |
| <i>Chorthippus jacobsi</i>            | 9.86      | 12.40       | Apr-Nov                | 8         | Plant          | 0-2000    |
| <i>Chorthippus montanus</i>           | 8.83      | 11.20       | Jun-Sep                | 4         | Plant          | 1800-2300 |
| <i>Chorthippus nevadensis</i>         | 7.30      | 8.53        | Ago-Sep                | 2         | Plant          | 1500-3300 |
| <i>Chorthippus parall. erythropus</i> | 9.75      | 11.71       | June-Nov               | 6         | Plant          | 100-2300  |
| <i>Chorthippus saulcyi moralesi</i>   | 9.14      | 11.10       | Jul-Oct                | 4         | Plant          | 900-2400  |
| <i>Chorthippus saulcyi saulcyi</i>    | 10.36     | 12.39       | Jul-Oct                | 4         | Plant          | 700-1800  |
| <i>Chorthippus vagans</i>             | 8.70      | 10.58       | Apr-Nov                | 8         | Plant          | 0-2500    |
| <i>Chorthippus yersini</i>            | 9.53      | 12.76       | May-Nov                | 7         | Plant          | 1200-2100 |
| <i>Cophopodisma pyrenaea</i>          | 8.81      | 10.64       | Jul-Oct                | 4         | Ground         | 1800-2300 |
| <i>Dericorys carthagonovae</i>        | 9.96      | 13.24       | Jun-Oct                | 5         | Plant          | 0-700     |
| <i>Dociostaurus crassiusculus</i>     | 9.62      | 12.24       | Jun-Ago                | 3         | Ground         | 600-1000  |
| <i>Dociostaurus hispanicus</i>        | 9.47      | 12.01       | Apr-Sep                | 6         | Ground         | 400-1500  |
| <i>Dociostaurus jagoi</i>             | 7.73      | 11.02       | Jul-Nov                | 5         | Ground         | 0-2000    |
| <i>Dociostaurus maroccanus</i>        | 13.04     | 13.46       | Jul-Ago                | 2         | Ground         | 400-1600  |
| <i>Euchorthippus chopardi</i>         | 10.09     | 11.67       | Jun-Nov                | 7         | Plant          | 100-2000  |
| <i>Euchorthippus declivus</i>         | 9.76      | 13.42       | Jun-Oct                | 5         | Plant          | 600-1400  |
| <i>Euchorthippus elegantulus</i>      | 10.32     | 13.76       | Jul-Oct                | 4         | Plant          | 0-1800    |
| <i>Euthystira brachyptera</i>         | 10.18     | 12.10       | Jun-Sept               | 4         | Plant          | 1300-2100 |
| <i>Eyprepocnemis plorans</i>          | 16.39     | 22.83       | May-Oct                | 6         | Plant          | 0-100     |
| <i>Gomphoceridius brevipennis</i>     | 8.87      | 10.17       | Aug-Oct                | 3         | Ground         | 2000-2500 |
| <i>Gomphocerus sibiricus</i>          | 10.58     | 12.46       | Jul-Sep                | 3         | Plant          | 1800-2100 |
| <i>Heteracris adspersa</i>            | 13.53     | 16.55       | Jul-Oct                | 4         | Ground         | 0-500     |
| <i>Heteracris littoralis</i>          | 15.35     | 22.16       | Jul-Oct                | 4         | Ground         | 0-100     |
| <i>Jacobsiella imitans</i>            | 8.91      | 11.13       | Jun-Sept               | 4         | Ground         | 0-100     |
| <i>Mioscirtus wagneri maghrebi</i>    | 8.38      | 11.40       | Jun-Nov                | 6         | Plant          | 0-1500    |
| <i>Mioscirtus wagneri wagneri</i>     | 7.74      | 10.86       | Jun-Nov                | 6         | Plant          | 0-1500    |
| <i>Morphacris fasciata</i>            | 10.54     | 13.87       | Jul-Oct                | 4         | Ground         | 0-100     |
| <i>Myrmeleotetix maculatus</i>        | 8.02      | 9.35        | Jul-Oct                | 4         | Ground         | 1100-2200 |
| <i>Oedaleus decorus</i>               | 14.35     | 16.51       | Apr-Oct                | 7         | Ground         | 400-1500  |
| <i>Oedipoda caerulea</i>              | 10.76     | 11.71       | Jun-Dec                | 7         | Ground         | 200-2000  |
| <i>Oedipoda charpentieri</i>          | 9.13      | 11.72       | Jun-Dec                | 7         | Ground         | 100-2000  |
| <i>Oedipoda fuscocincta</i>           | 11.48     | 13.56       | Jun-Oct                | 5         | Ground         | 600-2100  |
| <i>Omocestus antigai</i>              | 8.96      | 11.25       | Jul-Oct                | 4         | Ground         | 1600-2100 |
| <i>Omocestus bolivari</i>             | 7.23      | 8.53        | Jul-Oct                | 4         | Plant          | 1500-2500 |
| <i>Omocestus femoralis</i>            | 9.18      | 10.86       | Jun-Oct                | 5         | Plant          | 1500-2000 |
| <i>Omocestus haemorrhoidalis</i>      | 7.95      | 9.96        | Jul-Oct                | 4         | Plant          | 1500-2000 |
| <i>Omocestus minutissimus</i>         | 7.53      | 7.94        | Jul-Oct                | 4         | Ground         | 100-2500  |
| <i>Omocestus navasi</i>               | 10.22     | 12.53       | Jul-Oct                | 4         | Ground         | 1200-1700 |
| <i>Omocestus panteli</i>              | 7.58      | 10.99       | Apr-Nov                | 8         | Plant          | 400-1900  |
| <i>Omocestus raymondi</i>             | 8.48      | 10.51       | Jan-Dec                | 12        | Ground         | 0-1900    |

|                                             |       |       |           |   |        |           |
|---------------------------------------------|-------|-------|-----------|---|--------|-----------|
| <b><i>Omocestus rufipes</i></b>             | 8.68  | 11.26 | Apr-Dec   | 9 | Plant  | 1000-2000 |
| <b><i>Omocestus uhagonii</i></b>            | 7.82  | 9.37  | Jun-Oct   | 5 | Ground | 1700-2200 |
| <b><i>Omocestus viridulus viridulus</i></b> | 9.03  | 11.44 | Jun-Oct   | 5 | Plant  | 1300-2200 |
| <b><i>Omocestus viridulus kaestneri</i></b> | 10.09 | 13.65 | Jul-Oct   | 4 | Plant  | 500-2100  |
| <b><i>Paracaloptenus bolivari</i></b>       | 9.82  | 13.94 | Jun-Oct   | 5 | Ground | 1000-1600 |
| <b><i>Paracinema tricolor</i></b>           | 11.96 | 19.50 | Jul-Oct   | 6 | Plant  | 0-1500    |
| <b><i>Pezotettix giornae</i></b>            | 6.60  | 7.63  | Jun-Nov   | 6 | Ground | 0-2200    |
| <b><i>Podisma carpetana carpetana</i></b>   | 10.65 | 13.01 | Jul-Sep   | 3 | Ground | 1800-2000 |
| <b><i>Podisma carpetana ignatii</i></b>     | 9.82  | 12.05 | Jul-Sep   | 3 | Ground | 1800-2000 |
| <b><i>Podisma pedestris</i></b>             | 10.38 | 12.50 | Jul-Oct   | 6 | Ground | 1200-2600 |
| <b><i>Pseudosphin. azurescens</i></b>       | 8.95  | 10.67 | Jun-Oct   | 5 | Ground | 0-1700    |
| <b><i>Psophus stridulus</i></b>             | 14.29 | 15.42 | Jul-Sep   | 3 | Ground | 600-1600  |
| <b><i>Pyrgomorpha conica</i> (*)</b>        | 7.20  | 10.34 | Mar-Jul   | 6 | Plant  | 0-1000    |
| <b><i>Ramburiella hispanica</i></b>         | 11.67 | 15.49 | Jun-Oct   | 5 | Plant  | 0-1600    |
| <b><i>Stauroderus scalaris</i></b>          | 11.39 | 13.92 | Jun-Oct   | 5 | Plant  | 900-2200  |
| <b><i>Stenobothrus bolivarii</i></b>        | 10.62 | 14.63 | May-Ago   | 4 | Plant  | 700-1300  |
| <b><i>Stenobothrus festivus</i></b>         | 9.72  | 10.92 | May-Ago   | 4 | Plant  | 0-2000    |
| <b><i>Stenobothrus grammicus</i></b>        | 10.05 | 13.51 | Jun-Oct   | 5 | Ground | 1100-2000 |
| <b><i>Stenobothrus lineatus</i></b>         | 10.99 | 14.48 | Jun-Sep   | 4 | Plant  | 1300-2200 |
| <b><i>Stenobothrus nigromaculatus</i></b>   | 8.97  | 10.77 | Jul-Oct   | 4 | Plant  | 1100-2800 |
| <b><i>Stenobothrus fischeri</i></b>         | 9.75  | 12.97 | Jun-Sep   | 4 | Plant  | 800-1000  |
| <b><i>Stenobothrus stigmaticus</i></b>      | 7.53  | 9.53  | Jul-Nov   | 5 | Ground | 500-2200  |
| <b><i>Stethophyma grossum</i></b>           | 12.55 | 14.01 | Jul-Sep   | 3 | Ground | 1100-2000 |
| <b><i>Tropidopola cylindrica</i></b>        | 10.89 | 11.06 | April-Nov | 8 | Plant  | 0-500     |
| <b><i>Truxalis nasuta</i></b>               | 26.70 | 45.00 | Apr-Sep   | 6 | Ground | 0-700     |

1001 (continuation)

1002 (\*) Acridoidea

1003

1004

1005

1006 Table S3

| Taxa                                  | PDI   | Habitat                                                                          |
|---------------------------------------|-------|----------------------------------------------------------------------------------|
| <i>Acrida ungarica mediterranea</i>   | 1.000 | Wetlands, grassy river sides, marshes, reedbeds                                  |
| <i>Acrotylus insubricus</i>           | 0.642 | Steppes, dry grasslands, open habitats with disperse shrubs                      |
| <i>Acrotylus fischeri</i>             | 1.000 | High mountain vegetation, scrublands                                             |
| <i>Acrotylus patruelis</i>            | 0.677 | Sandy soils with scarce vegetation, beaches, dunes and deserts                   |
| <i>Aiolopus puissanti</i>             | 0.702 | Marshes, dunes, sandy wastelands                                                 |
| <i>Aiolopus strepens</i>              | 0.857 | Steppes, dry grasslands, open habitats with disperse shrubs, hillsides           |
| <i>Aiolopus thalassinus</i>           | 0.773 | Wetlands, grassy river sides, marshes, reedbeds                                  |
| <i>Arcyptera fusca</i>                | 1.000 | Nutrient-poor grasslands, subalpine meadows, pastures, rocky slopes              |
| <i>Arcyptera microptera</i>           | 0.785 | Steppes and dry and warm grasslands                                              |
| <i>Arcyptera tornosi</i>              | 0.857 | Shrublands                                                                       |
| <i>Arcyptera brevipennis</i>          | 0.815 | Erinaceae shrubs                                                                 |
| <i>Brachycrotaphus tryxalicerus</i>   | 0.857 | Steppes, savanna-like habitats                                                   |
| <i>Bohemanella frigida</i>            | 0.714 | Alpine meadows, stony meadows and pastures                                       |
| <i>Calephorus compressicornis</i>     | 0.487 | Wetlands, dunes, grassy river sides, marshes, reedbeds                           |
| <i>Calliptamus barbarus</i>           | 0.481 | Steppes, dry grasslands, open habitats with disperse shrubs, stony slopes        |
| <i>Calliptamus italicus</i>           | 1.000 | Nutrient-poor grasslands, sand areas, rocky slopes and steppe-like places        |
| <i>Calliptamus wattenwylanus</i>      | 0.534 | Wastelands, rocky and grazed areas                                               |
| <i>Chorthippus apicalis</i>           | 0.857 | Grassy riversides, grassy wetlands, pastures, grasslands                         |
| <i>Chorthippus binotatus</i>          | 0.630 | Legume shrub (scrub) lands exclusively                                           |
| <i>Chorthippus jucundus</i>           | 0.785 | Moist soil, lowland wetlands, grassy riversides, small streams ( <i>Juncus</i> ) |
| <i>Chorthippus jacobsi</i>            | 0.773 | Steppes, dry grasslands, pastures, open habitats with disperse shrubs            |
| <i>Chorthippus montanus</i>           | 0.815 | Wet meadows, moors, fens, sedge reeds, bogs                                      |
| <i>Chorthippus nevadensis</i>         | 0.730 | High mountain vegetation, broom communities (piornal)                            |
| <i>Chorthippus parall. erythropus</i> | 0.887 | Pastures, grasslands, meadows, gardens                                           |
| <i>Chorthippus saulcyi moralesi</i>   | 0.815 | Sub-mediterranean shrub formations, mesophile montane grasslands                 |
| <i>Chorthippus saulcyi saulcyi</i>    | 0.767 | Mesophilic grasslands                                                            |
| <i>Chorthippus vagans</i>             | 0.815 | Forest ecotones, gappy grasslands, sandy pinewoods, alpine scrublands            |
| <i>Chorthippus yersini</i>            | 0.887 | Alpine meadows, short and dense shrublands                                       |
| <i>Cophopodisma pyrenaea</i>          | 0.857 | Alpine and subalpine meadows                                                     |
| <i>Dericorys carthagonovae</i>        | 0.887 | Desert scrub, saltworts                                                          |
| <i>Dociostaurus crassiusculus</i>     | 0.887 | Steppes, dry grasslands, open areas with disperse shrubs, gypsum soils           |
| <i>Dociostaurus hispanicus</i>        | 0.928 | Dry land pastures, xerophilic vegetation, low and sparse shrubs                  |
| <i>Dociostaurus jagoi</i>             | 0.677 | Steppes, dry grasslands, open habitats with disperse shrubs                      |
| <i>Dociostaurus maroccanus</i>        | 0.887 | Cereal crops, floodlands, meadows                                                |
| <i>Euchorthippus chopardi</i>         | 0.857 | Maquis, rosemary scrubs, grasslands, open habitats with disperse shrubs          |
| <i>Euchorthippus declivus</i>         | 0.443 | Steppes, dry grasslands, wet meadows and managed pastures                        |
| <i>Euchorthippus elegantulus</i>      | 0.928 | Pastures                                                                         |
| <i>Euthystira brachyptera</i>         | 0.857 | Mires, damp pastures, marshy meadows, peatbogs                                   |
| <i>Eyprepocnemis plorans</i>          | 1.000 | Marshes, river streams, rice fields                                              |
| <i>Gomphoceridius brevipennis</i>     | 0.767 | Alpine meadow                                                                    |
| <i>Gomphocerus sibiricus</i>          | 0.815 | Pastures, alpine and subalpine meadows, rupicolous shrubs, screes                |
| <i>Heteracris adspersa</i>            | 0.928 | Hipersaline lagoons, dunes, beaches                                              |
| <i>Heteracris littoralis</i>          | 0.928 | Dunes, beaches, saltwort                                                         |
| <i>Jacobsiella imitans</i>            | 0.928 | Movable dunes, sandy soils, pinewoods, thickets                                  |
| <i>Mioscirtus wagneri maghrebi</i>    | 1.000 | Halophilous communities, lagoon shores, low grounds with <i>Suaeda vera</i>      |
| <i>Mioscirtus wagneri wagneri</i>     | 0.534 | Hypersaline low ground, lagoon shores                                            |
| <i>Morphacris fasciata</i>            | 0.819 | Dunes, beaches, sandy soils                                                      |
| <i>Myrmeleotettix maculatus</i>       | 0.928 | Alpine meadows, piornal, dense shrublands, stony pastures, grasslands            |
| <i>Oedaleus decorus</i>               | 1.000 | Rockrose scrub, heathland, meadows and cereal field margins                      |
| <i>Oedipoda caerulescens</i>          | 0.767 | Steppes, dunes, heathlands, dry grasslands, limestone rocks                      |
| <i>Oedipoda fuscescens</i>            | 0.857 | Rosemary scrub, thyme bushes                                                     |
| <i>Oedipoda fuscocincta</i>           | 0.815 | Open habitats with disperse shrubs, broom communities, alpine meadows            |
| <i>Omocestus antigai</i>              | 0.815 | Thorn scrub patches, broom communities                                           |
| <i>Omocestus bolivari</i>             | 0.815 | Alpine meadows, broom communities                                                |
| <i>Omocestus femoralis</i>            | 1.000 | Alpine meadows, broom communities                                                |



|                                             |       |                                                                         |
|---------------------------------------------|-------|-------------------------------------------------------------------------|
| <b><i>Omocestus haemorrhoidalis</i></b>     | 0.631 | Alpine meadows, gappy and grazed pastures, pet boags, open areas        |
| <b><i>Omocestus minutissimus</i></b>        | 1.000 | Thorn scrub patches, broom communities                                  |
| <b><i>Omocestus navasi</i></b>              | 1.000 | Thorn scrub patches, broom communities                                  |
| <b><i>Omocestus panteli</i></b>             | 1.000 | Moist soil, lowland wetlands, grassy riversides, small streams          |
| <b><i>Omocestus raymondi</i></b>            | 0.730 | Open habitats with disperse shrubs, gappy grasslands, rocky slopes      |
| <b><i>Omocestus rufipes</i></b>             | 0.443 | Heath bogs, dry fens, old quarries, wood clearings                      |
| <b><i>Omocestus uhagonii</i></b>            | 0.639 | Open habitats with disperse shrubs, and rocky slopes                    |
| <b><i>Omocestus viridulus viridulus</i></b> | 0.391 | Alpine and subalpine meadows, fens                                      |
| <b><i>Omocestus viridulus kaestneri</i></b> | 1.000 | Humid grasslands and montane meadows                                    |
| <b><i>Paracaloptenus bolivari</i></b>       | 1.000 | Stony and rocky embankments, stony pastures                             |
| <b><i>Paracinema tricolor</i></b>           | 0.928 | Moist soil, lowland wetlands, grassy riversides, small streams          |
| <b><i>Pezotettix giornae</i></b>            | 0.887 | Open habitats, shrublands, grasslands, ecotones, embankments, edges     |
| <b><i>Podisma carpetana carpetana</i></b>   | 1.000 | Alpine meadows, screes, rupicolous shrubs, rocky slopes                 |
| <b><i>Podisma carpetana ignatii</i></b>     | 0.338 | Alpine meadows, screes, rupicolous shrubs, rocky slopes                 |
| <b><i>Podisma pedestris</i></b>             | 1.000 | Alpine meadows, screes, rupicolous shrubs, rocky slopes                 |
| <b><i>Pseudosphin. azurescens</i></b>       | 0.815 | Dry and sandy soils, gypsum soils with disperse shrub                   |
| <b><i>Psophus stridulus</i></b>             | 0.887 | Heathland, damp pasture, subalpine meadow, clear and sunny pine forests |
| <b><i>Pyrgormorpha conica</i> (*)</b>       | 0.767 | Gappy habitats with open soil spots, gravel areas along rivers, dunes   |
| <b><i>Ramburiella hispanica</i></b>         | 1.000 | Sparto formations, halophylous communities, grasslands, dry river beds  |
| <b><i>Stauroderus scalaris</i></b>          | 0.887 | Warm and dry grasslands, pastures and extensive meadows, screes         |
| <b><i>Stenobothrus bolivarii</i></b>        | 1.000 | Dense scrublands                                                        |
| <b><i>Stenobothrus festivus</i></b>         | 1.000 | Mediterranean scrubland ( <i>Thyme</i> bushes)                          |
| <b><i>Stenobothrus grammicus</i></b>        | 0.677 | Alpine meadows, pastures, thicket, rosemary scrub                       |
| <b><i>Stenobothrus lineatus</i></b>         | 0.857 | Heathland, grassy margins of damp woodland, mountain meadows            |
| <b><i>Stenobothrus nigromaculatus</i></b>   | 0.631 | Grappy and grazed grasslands, subalpine meadows                         |
| <b><i>Stenobothrus fischeri</i></b>         | 1.000 | Gappy, dry and poor-nutrient soils                                      |
| <b><i>Stenobothrus stigmaticus</i></b>      | 0.702 | Heathland, grazed grasslands, alpine meadows, dense shrublands          |
| <b><i>Stethophyma grossum</i></b>           | 1.000 | Alpine meadows, pastures near rivers, pet boags                         |
| <b><i>Tropidopola cylindrica</i></b>        | 0.857 | Reedbed, river streams, saltworts                                       |
| <b><i>Truxalis nasuta</i></b>               | 0.624 | Gappy scrublands, sandy soils                                           |

1007 (continuation)

1008 (\*) Acridoidea

1009

1010

1011 Table S4

|                                       | I: Coastal habitats, marshes, sandy soils | II: Mires, bogs and fens | III: Wetlands, riversides | IV: Steppe and dry grasslands | V: Pastures, alpine meadows | VI: Heathland, scrub and tundra | VII: High mountain vegetation | VIII: Woodlands, shrublands, ecotones | IX: Inland unvegetated habitats (scree, etc) |
|---------------------------------------|-------------------------------------------|--------------------------|---------------------------|-------------------------------|-----------------------------|---------------------------------|-------------------------------|---------------------------------------|----------------------------------------------|
| <i>Acrida ungarica mediterranea</i>   | 2                                         | 0                        | 3                         | 0                             | 1                           | 0                               | 0                             | 0                                     | 0                                            |
| <i>Acrotylus insubricus</i>           | 2                                         | 0                        | 0                         | 2                             | 1                           | 2                               | 0                             | 0                                     | 2                                            |
| <i>Acrotylus fischeri</i>             | 0                                         | 0                        | 0                         | 0                             | 0                           | 2                               | 2                             | 0                                     | 0                                            |
| <i>Acrotylus patruelis</i>            | 3                                         | 0                        | 0                         | 2                             | 0                           | 0                               | 0                             | 0                                     | 0                                            |
| <i>Aiolopus puissantii</i>            | 3                                         | 0                        | 1                         | 0                             | 0                           | 0                               | 0                             | 0                                     | 0                                            |
| <i>Aiolopus strepens</i>              | 1                                         | 0                        | 1                         | 2                             | 2                           | 2                               | 0                             | 2                                     | 2                                            |
| <i>Aiolopus thalassinus</i>           | 1                                         | 2                        | 3                         | 0                             | 1                           | 0                               | 0                             | 0                                     | 0                                            |
| <i>Arcyptera fusca</i>                | 0                                         | 2                        | 0                         | 1                             | 2                           | 2                               | 0                             | 0                                     | 1                                            |
| <i>Arcyptera microptera</i>           | 0                                         | 0                        | 0                         | 3                             | 0                           | 1                               | 0                             | 0                                     | 0                                            |
| <i>Arcyptera tornosi</i>              | 0                                         | 0                        | 0                         | 0                             | 0                           | 1                               | 0                             | 3                                     | 0                                            |
| <i>Arcyptera brevipennis</i>          | 0                                         | 0                        | 0                         | 0                             | 0                           | 0                               | 3                             | 0                                     | 0                                            |
| <i>Brachycrotaphus tryxalicerus</i>   | 0                                         | 0                        | 0                         | 3                             | 0                           | 0                               | 0                             | 0                                     | 0                                            |
| <i>Calephorus compressicornis</i>     | 3                                         | 0                        | 2                         | 0                             | 0                           | 0                               | 0                             | 0                                     | 0                                            |
| <i>Calliptamus barbarus</i>           | 0                                         | 0                        | 0                         | 2                             | 1                           | 2                               | 2                             | 2                                     | 1                                            |
| <i>Calliptamus italicus</i>           | 0                                         | 0                        | 0                         | 2                             | 1                           | 2                               | 1                             | 2                                     | 1                                            |
| <i>Calliptamus wattenwylanus</i>      | 1                                         | 0                        | 0                         | 2                             | 1                           | 1                               | 1                             | 0                                     | 1                                            |
| <i>Chorthippus apicalis</i>           | 0                                         | 0                        | 3                         | 1                             | 3                           | 1                               | 0                             | 0                                     | 1                                            |
| <i>Chorthippus binotatus</i>          | 0                                         | 0                        | 0                         | 0                             | 1                           | 3                               | 3                             | 0                                     | 0                                            |
| <i>Chorthippus jucundus</i>           | 0                                         | 0                        | 3                         | 0                             | 0                           | 0                               | 0                             | 0                                     | 0                                            |
| <i>Chorthippus jacobsi</i>            | 0                                         | 0                        | 1                         | 2                             | 3                           | 2                               | 1                             | 1                                     | 1                                            |
| <i>Chorthippus montanus</i>           | 0                                         | 3                        | 2                         | 0                             | 2                           | 0                               | 0                             | 0                                     | 0                                            |
| <i>Chorthippus nevadensis</i>         | 0                                         | 0                        | 0                         | 0                             | 0                           | 0                               | 3                             | 0                                     | 0                                            |
| <i>Chorthippus parall. erythropus</i> | 0                                         | 0                        | 2                         | 2                             | 3                           | 1                               | 0                             | 1                                     | 0                                            |
| <i>Chorthippus saulcyi moralesi</i>   | 0                                         | 0                        | 0                         | 0                             | 1                           | 0                               | 3                             | 2                                     | 0                                            |
| <i>Chorthippus saulcyi saulcyi</i>    | 0                                         | 0                        | 0                         | 0                             | 2                           | 0                               | 0                             | 2                                     | 0                                            |
| <i>Chorthippus vagans</i>             | 0                                         | 0                        | 0                         | 2                             | 0                           | 2                               | 1                             | 2                                     | 2                                            |
| <i>Chorthippus yersini</i>            | 0                                         | 1                        | 0                         | 0                             | 3                           | 0                               | 1                             | 0                                     | 0                                            |
| <i>Cophopodisma pyrenaea</i>          | 0                                         | 2                        | 0                         | 0                             | 2                           | 0                               | 0                             | 0                                     | 0                                            |
| <i>Dericorys carthagonovae</i>        | 0                                         | 0                        | 0                         | 3                             | 0                           | 0                               | 0                             | 0                                     | 0                                            |
| <i>Dociostaurus crassiusculus</i>     | 0                                         | 0                        | 0                         | 3                             | 0                           | 2                               | 0                             | 1                                     | 0                                            |
| <i>Dociostaurus hispanicus</i>        | 1                                         | 0                        | 0                         | 3                             | 0                           | 1                               | 0                             | 0                                     | 0                                            |
| <i>Dociostaurus jagoi</i>             | 3                                         | 0                        | 0                         | 2                             | 0                           | 1                               | 0                             | 0                                     | 1                                            |
| <i>Dociostaurus maroccanus</i>        | 0                                         | 0                        | 0                         | 3                             | 1                           | 0                               | 0                             | 0                                     | 0                                            |
| <i>Euchorthippus chopardi</i>         | 0                                         | 0                        | 0                         | 2                             | 1                           | 2                               | 0                             | 3                                     | 0                                            |
| <i>Euchorthippus declivus</i>         | 0                                         | 0                        | 0                         | 2                             | 2                           | 1                               | 0                             | 1                                     | 0                                            |
| <i>Euchorthippus elegantulus</i>      | 0                                         | 0                        | 0                         | 0                             | 3                           | 0                               | 0                             | 0                                     | 0                                            |
| <i>Euthystira brachyptera</i>         | 0                                         | 3                        | 0                         | 0                             | 1                           | 0                               | 0                             | 1                                     | 0                                            |
| <i>Eyprepocnemis plorans</i>          | 1                                         | 0                        | 3                         | 0                             | 0                           | 0                               | 0                             | 0                                     | 0                                            |
| <i>Gomphoceridius brevipennis</i>     | 0                                         | 3                        | 0                         | 0                             | 3                           | 0                               | 1                             | 0                                     | 0                                            |
| <i>Gomphocerus sibiricus</i>          | 0                                         | 1                        | 0                         | 0                             | 3                           | 0                               | 1                             | 0                                     | 0                                            |
| <i>Heteracris adspersa</i>            | 2                                         | 0                        | 0                         | 2                             | 0                           | 0                               | 0                             | 0                                     | 0                                            |
| <i>Heteracris littoralis</i>          | 3                                         | 0                        | 2                         | 0                             | 0                           | 0                               | 0                             | 0                                     | 0                                            |
| <i>Jacobsiella imitans</i>            | 2                                         | 0                        | 0                         | 0                             | 0                           | 0                               | 0                             | 2                                     | 0                                            |

|                                      |   |   |   |   |   |   |   |   |   |
|--------------------------------------|---|---|---|---|---|---|---|---|---|
| <i>Mioscirtus wagneri maghrebi</i>   | 2 | 0 | 0 | 3 | 0 | 0 | 0 | 0 | 0 |
| <i>Mioscirtus wagneri wagneri</i>    | 2 | 0 | 0 | 3 | 0 | 0 | 0 | 0 | 0 |
| <i>Morphacris fasciata</i>           | 3 | 0 | 0 | 0 | 0 | 0 | 0 | 0 | 0 |
| <i>Myrmeleotettix maculatus</i>      | 0 | 0 | 0 | 2 | 2 | 1 | 1 | 0 | 0 |
| <i>Oedaleus decorus</i>              | 0 | 0 | 0 | 1 | 2 | 3 | 0 | 2 | 0 |
| <i>Oedipoda caerulescens</i>         | 2 | 0 | 0 | 3 | 0 | 2 | 1 | 1 | 2 |
| <i>Oedipoda charpentieri</i>         | 0 | 0 | 0 | 0 | 0 | 2 | 0 | 2 | 0 |
| <i>Oedipoda fuscocincta</i>          | 0 | 0 | 0 | 2 | 1 | 1 | 2 | 0 | 0 |
| <i>Omocestus antigai</i>             | 0 | 0 | 0 | 0 | 3 | 2 | 0 | 0 | 0 |
| <i>Omocestus bolivari</i>            | 0 | 0 | 0 | 0 | 2 | 0 | 2 | 0 | 0 |
| <i>Omocestus femoralis</i>           | 0 | 0 | 0 | 0 | 2 | 0 | 2 | 0 | 0 |
| <i>Omocestus haemorrhoidalis</i>     | 0 | 0 | 0 | 2 | 0 | 1 | 1 | 0 | 1 |
| <i>Omocestus minutissimus</i>        | 0 | 0 | 0 | 0 | 0 | 2 | 3 | 0 | 0 |
| <i>Omocestus navasi</i>              | 0 | 0 | 0 | 0 | 0 | 2 | 3 | 0 | 0 |
| <i>Omocestus panteli</i>             | 0 | 2 | 3 | 0 | 0 | 0 | 0 | 0 | 0 |
| <i>Omocestus raymondi</i>            | 1 | 0 | 0 | 2 | 1 | 1 | 2 | 2 | 1 |
| <i>Omocestus rufipes</i>             | 0 | 2 | 0 | 0 | 1 | 0 | 0 | 2 | 0 |
| <i>Omocestus uhagonii</i>            | 0 | 0 | 0 | 0 | 1 | 0 | 3 | 0 | 0 |
| <i>Omocestus viridulus viridulus</i> | 0 | 2 | 1 | 0 | 3 | 0 | 0 | 0 | 0 |
| <i>Omocestus viridulus kaestneri</i> | 0 | 2 | 1 | 0 | 3 | 0 | 0 | 0 | 0 |
| <i>Paracaloptenus bolivari</i>       | 0 | 0 | 0 | 0 | 2 | 1 | 1 | 0 | 1 |
| <i>Paracinema tricolor</i>           | 0 | 0 | 3 | 0 | 2 | 0 | 0 | 0 | 0 |
| <i>Pezotettix giornae</i>            | 0 | 0 | 0 | 2 | 0 | 2 | 1 | 3 | 1 |
| <i>Podisma carpetana carpetana</i>   | 0 | 0 | 0 | 0 | 2 | 0 | 3 | 0 | 1 |
| <i>Podisma carpetana ignatii</i>     | 0 | 0 | 0 | 0 | 2 | 0 | 3 | 0 | 1 |
| <i>Podisma pedestris</i>             | 0 | 0 | 0 | 0 | 2 | 0 | 3 | 0 | 1 |
| <i>Pseudosphin. azurescens</i>       | 0 | 0 | 0 | 2 | 0 | 1 | 0 | 2 | 0 |
| <i>Psophus stridulus</i>             | 0 | 0 | 0 | 0 | 3 | 2 | 0 | 0 | 0 |
| <i>Pyrgormorpha conica</i> (*)       | 0 | 0 | 0 | 2 | 0 | 2 | 0 | 2 | 0 |
| <i>Ramburiella hispanica</i>         | 1 | 0 | 0 | 3 | 0 | 0 | 0 | 0 | 0 |
| <i>Stauroderus scalaris</i>          | 0 | 0 | 0 | 2 | 2 | 0 | 2 | 1 | 1 |
| <i>Stenobothrus bolivarii</i>        | 0 | 0 | 0 | 0 | 0 | 1 | 0 | 3 | 0 |
| <i>Stenobothrus festivus</i>         | 0 | 0 | 0 | 0 | 2 | 2 | 0 | 1 | 0 |
| <i>Stenobothrus grammicus</i>        | 0 | 0 | 0 | 0 | 3 | 0 | 0 | 0 | 0 |
| <i>Stenobothrus lineatus</i>         | 0 | 0 | 0 | 0 | 2 | 3 | 0 | 2 | 0 |
| <i>Stenobothrus nigromaculatus</i>   | 0 | 0 | 0 | 0 | 3 | 2 | 0 | 1 | 0 |
| <i>Stenobothrus fischeri</i>         | 0 | 0 | 0 | 0 | 2 | 0 | 0 | 2 | 0 |
| <i>Stenobothrus stigmaticus</i>      | 0 | 0 | 0 | 0 | 2 | 3 | 0 | 0 | 0 |
| <i>Stethophyma grossum</i>           | 0 | 3 | 0 | 0 | 2 | 0 | 0 | 0 | 0 |
| <i>Tropidopola cylindrica</i>        | 2 | 0 | 3 | 0 | 0 | 0 | 0 | 0 | 0 |
| <i>Truxalis nasuta</i>               | 2 | 0 | 0 | 0 | 0 | 1 | 0 | 0 | 0 |
| <i>Bohemanella frigida</i>           | 0 | 0 | 0 | 0 | 2 | 0 | 2 | 0 | 1 |

1012

1013

1014

1015

1016

1017

1018

1019 Figure S1

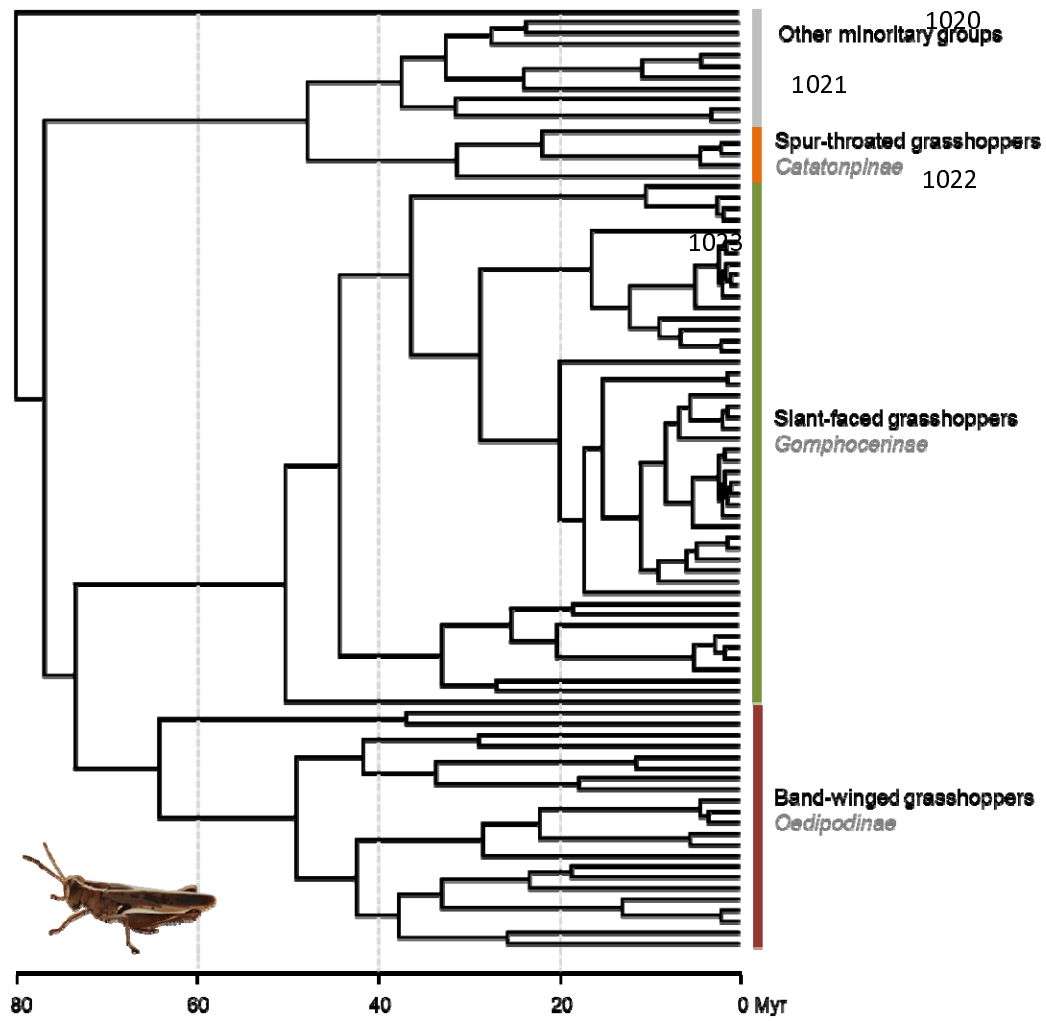

Source: http://biorxiv.org/content/10.1101/119560v1.full.pdf
